# Supplementary material for: Titanium(iv) enolates of cyclic ketones – stereoselective addition of cyclododecanone to aromatic aldehydes
Source: Royal Society of Chemistry journal article supplement (doi:10.1039/d3nj02355a), 2023-01-01

## Supporting information

### **Titanium(IV) enolates of cyclic ketones – stereoselective addition of cyclododecanone to aromatic aldehydes.**

Dariusz Cież,<sup>\*a</sup> Aleksandra Pałasz,<sup>a</sup> Krzysztof Koziół,<sup>a</sup> Antonii Lutsan<sup>a</sup> and Justyna Kalinowska-Tłuścik<sup>a</sup>

<sup>a</sup> Jagiellonian University, Department of Chemistry, 30 - 387 Kraków , Poland

<sup>\*</sup>Corresponding author. Tel: +48 12 686 2448. Email address: [dariusz.ciez@uj.edu.pl](mailto:dariusz.ciez@uj.edu.pl)

### Content

|                     |        |
|---------------------|--------|
| 1. NMR spectra..... | 2 - 25 |
|---------------------|--------|

# NMR spectra

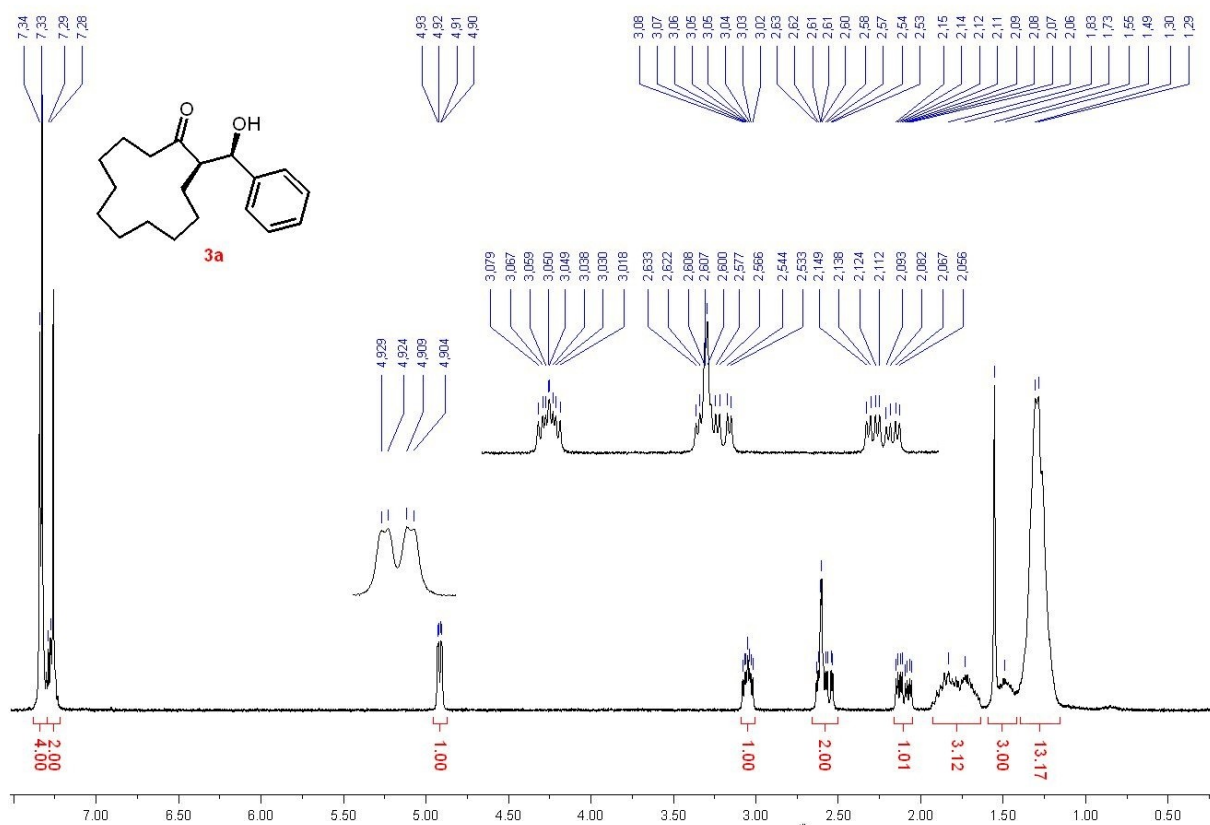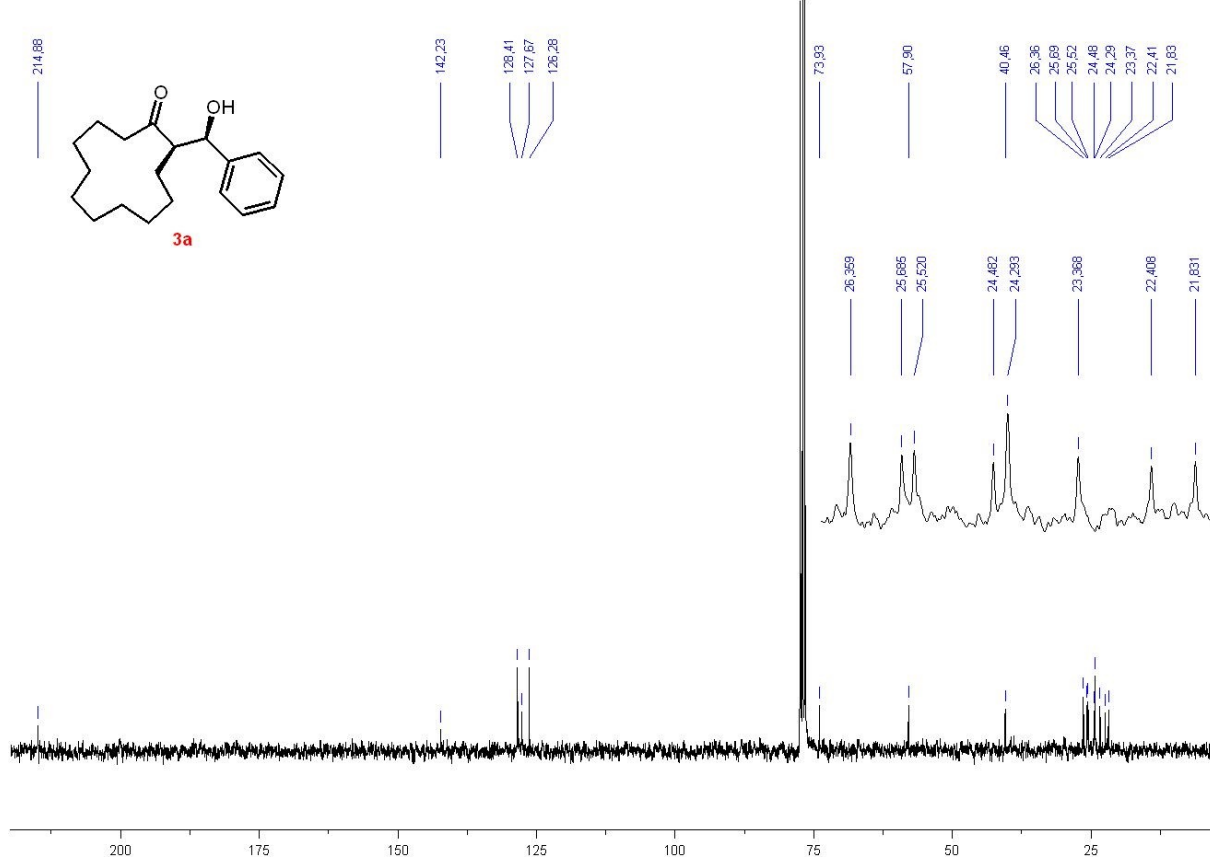





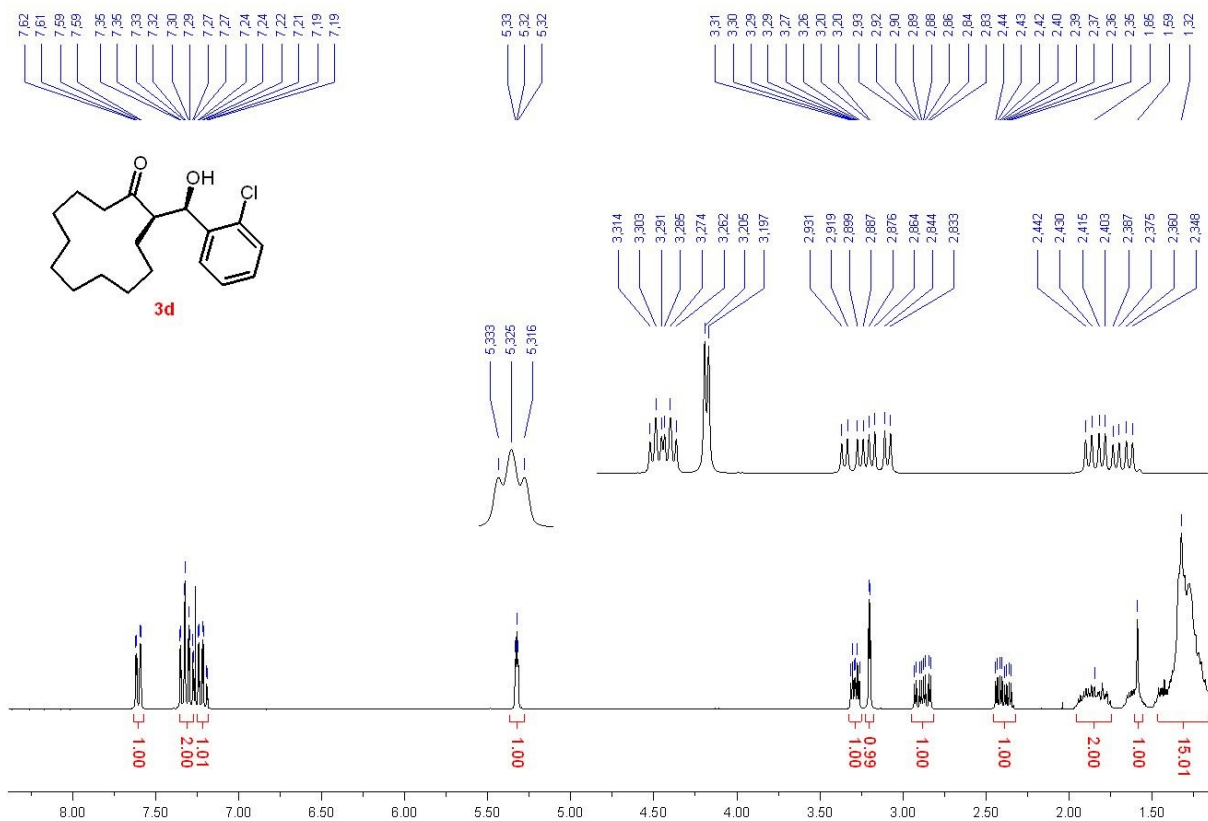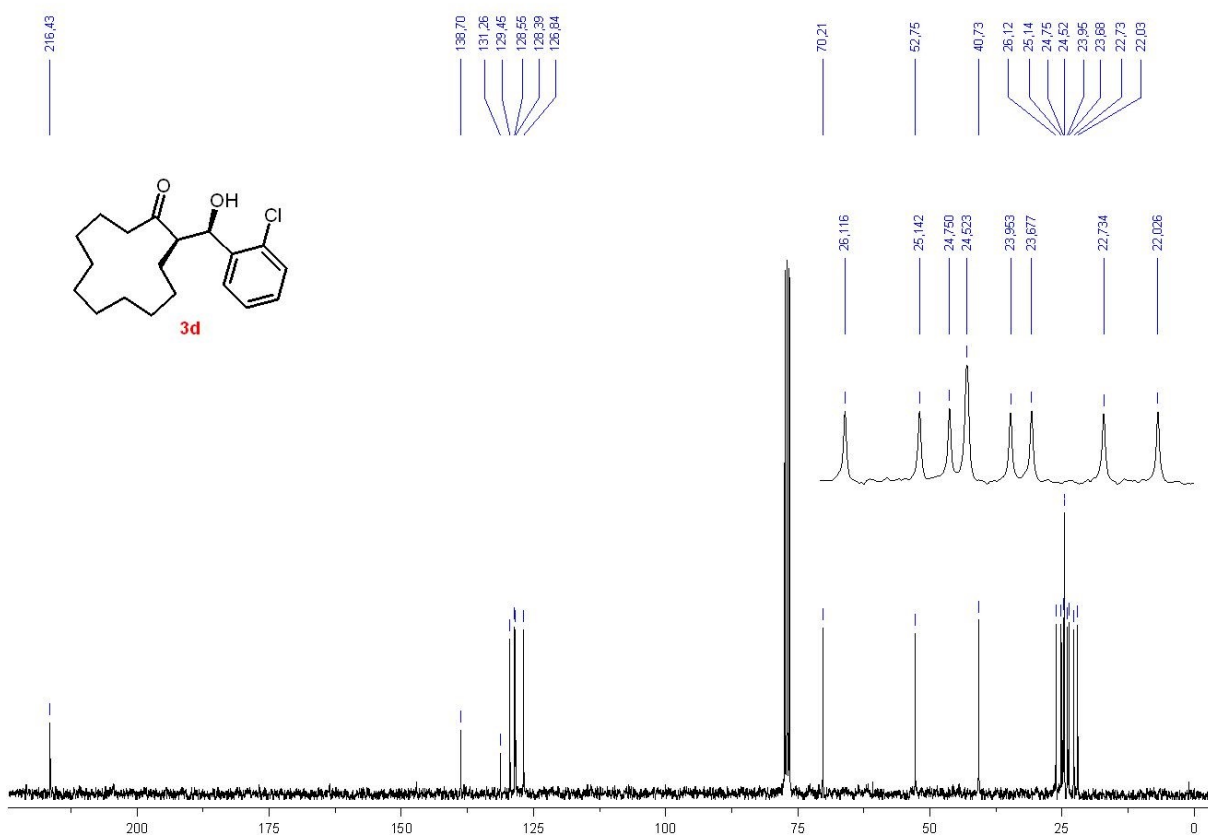

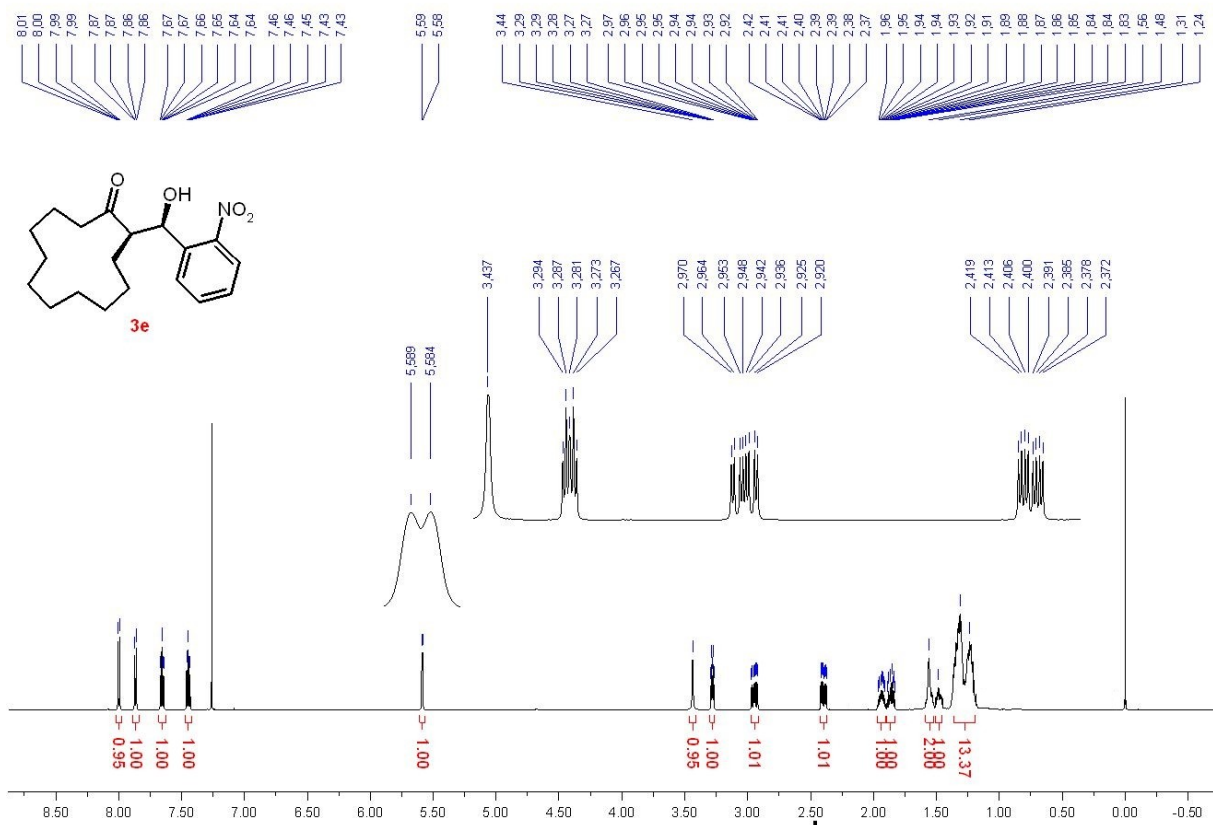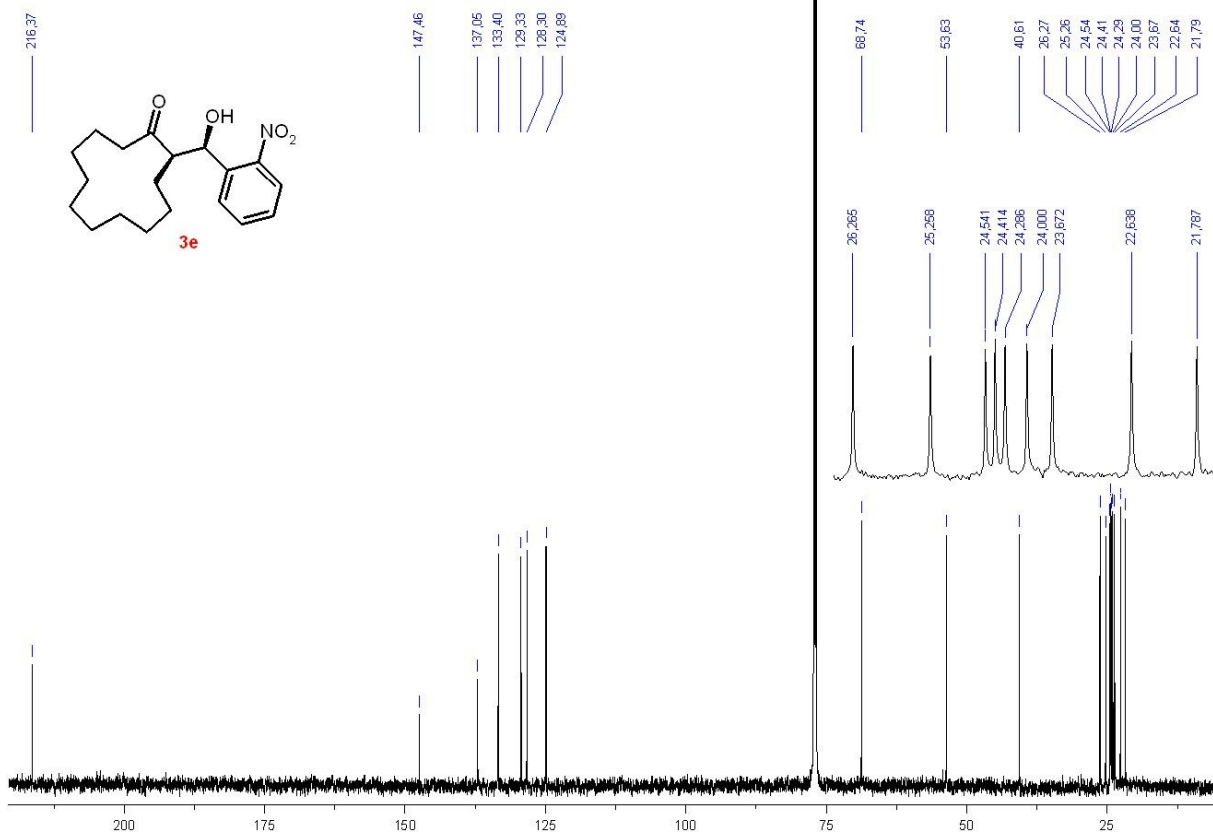

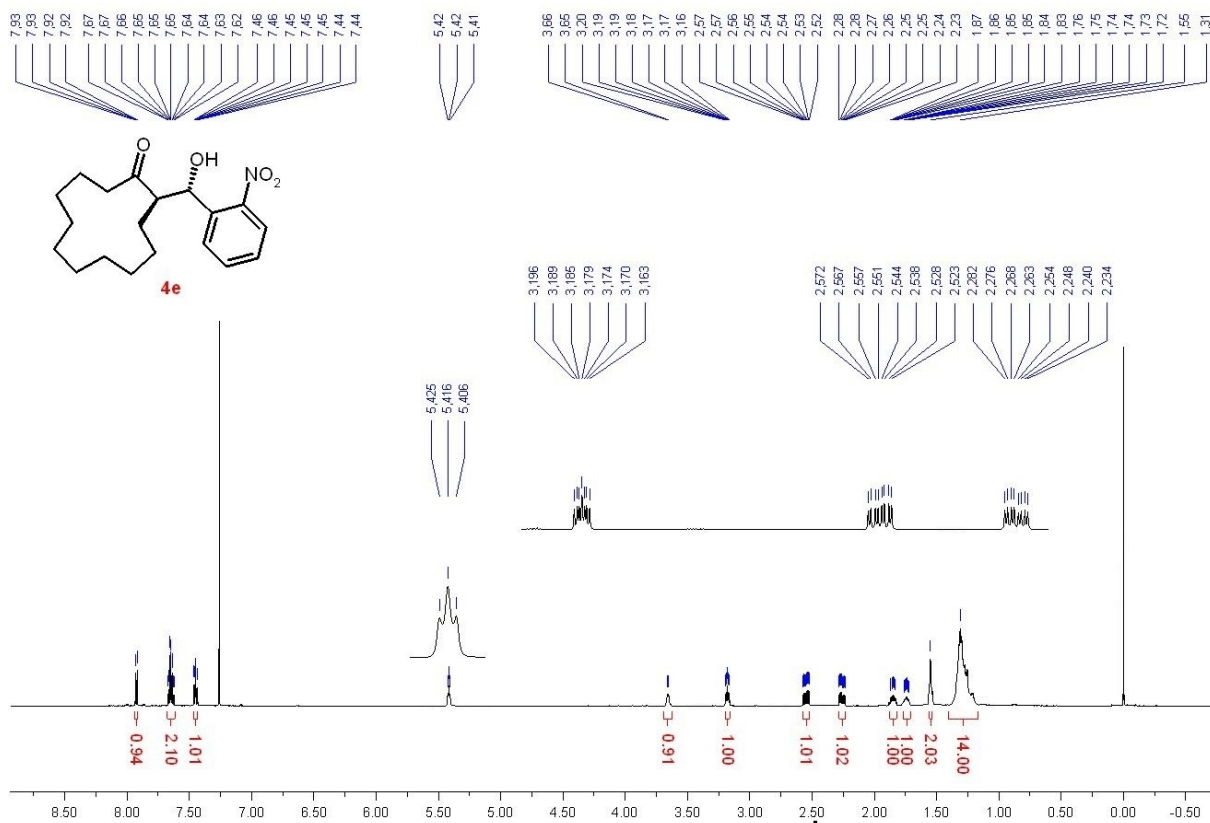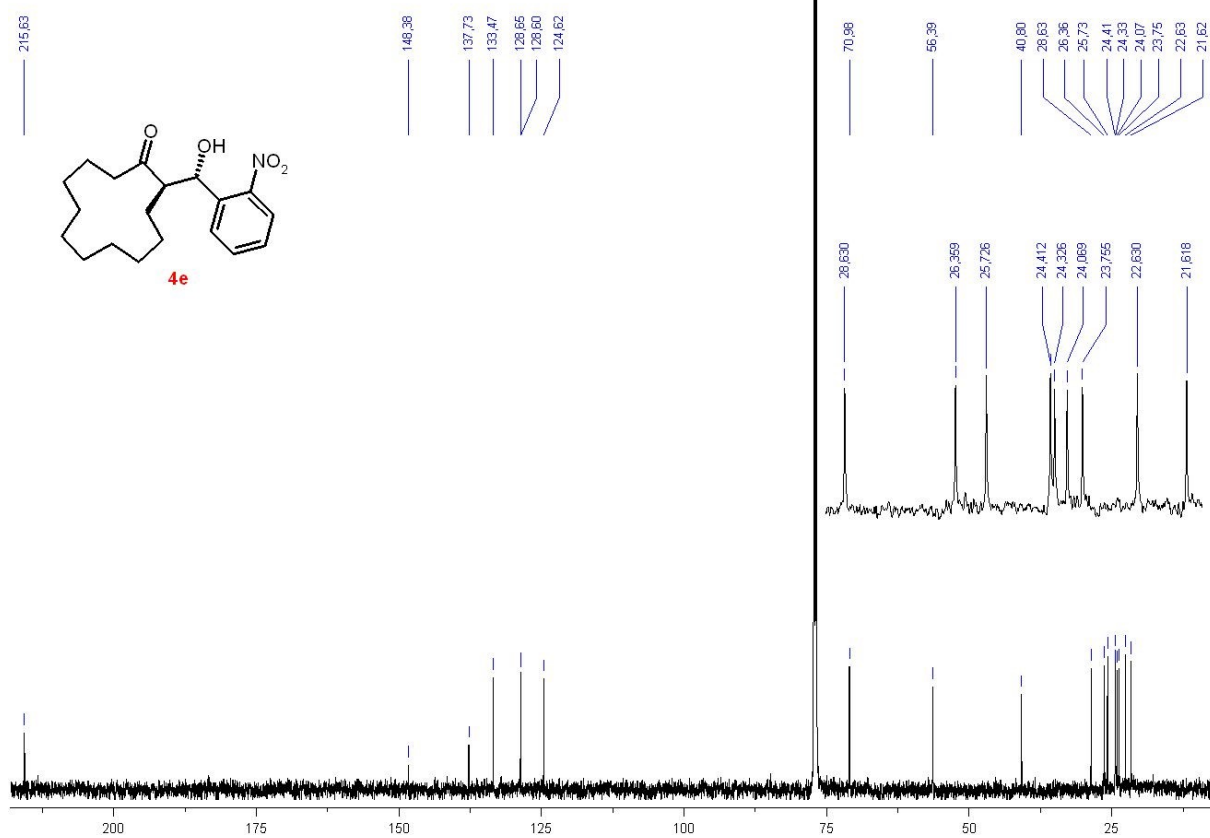

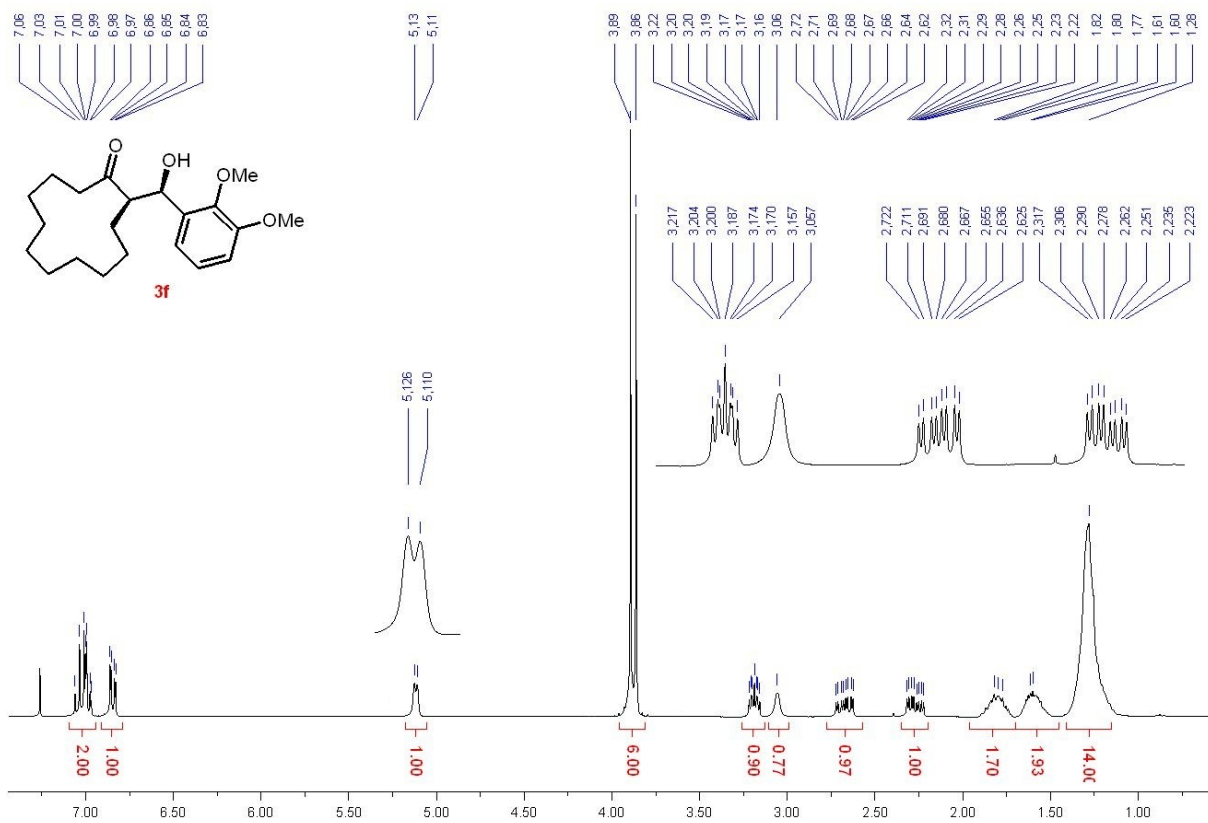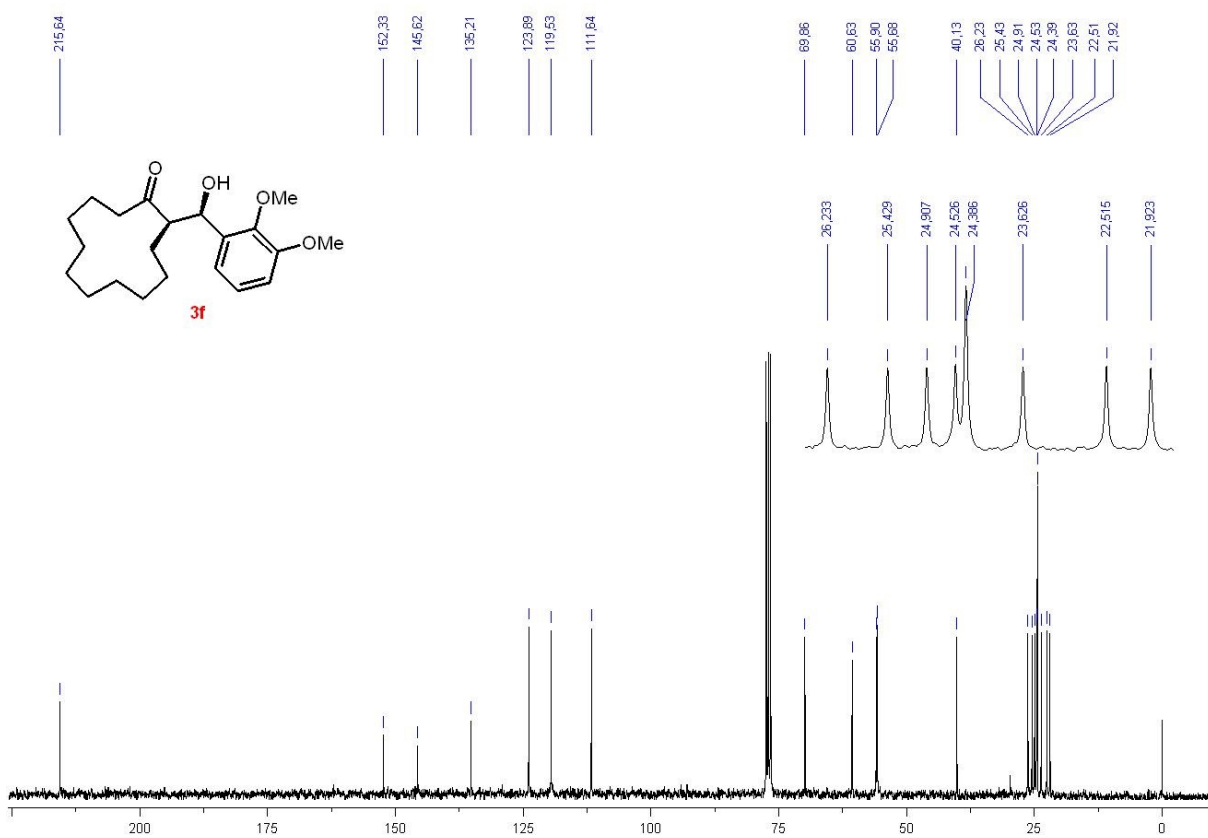



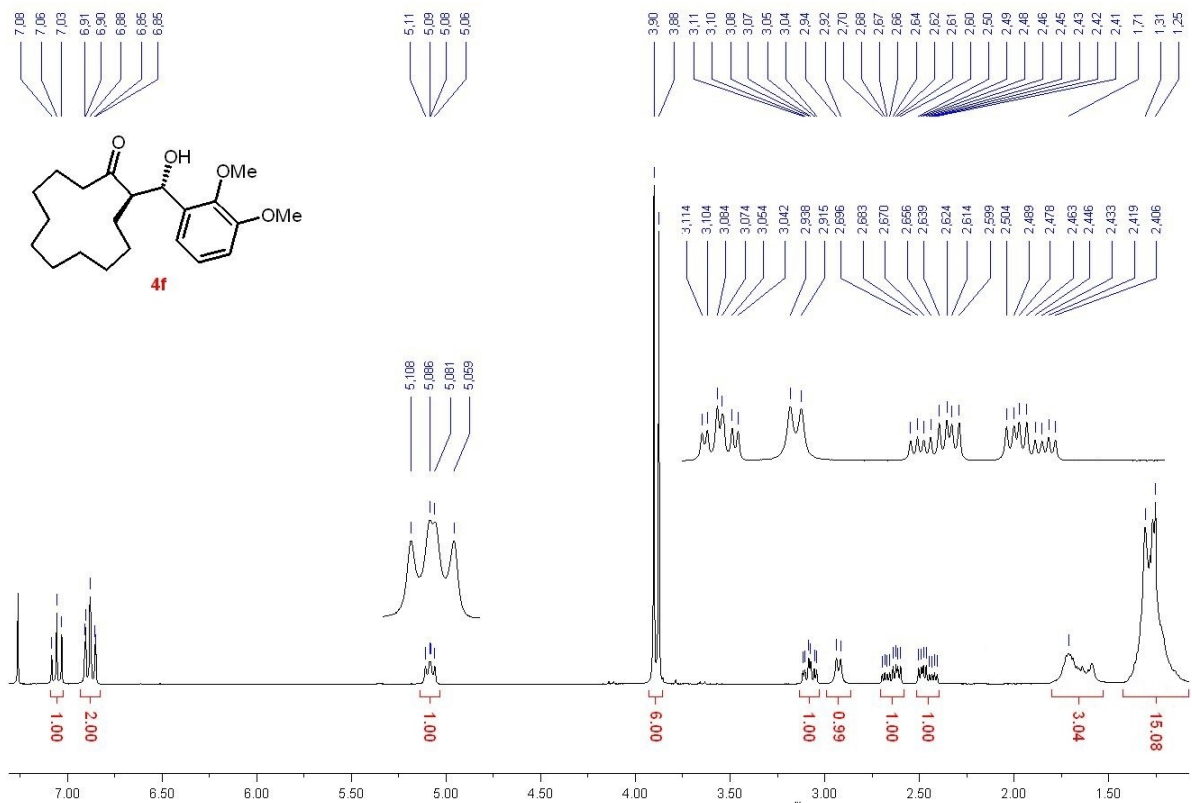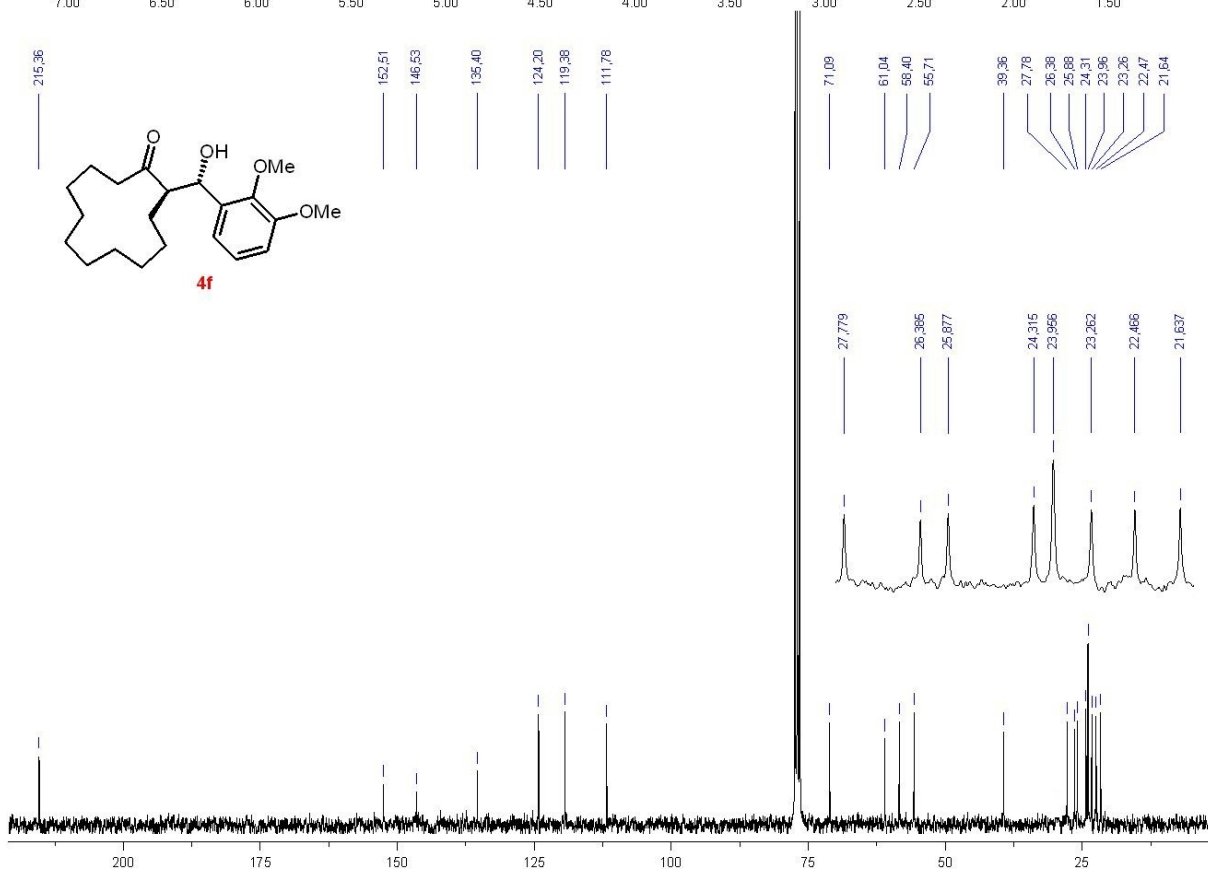

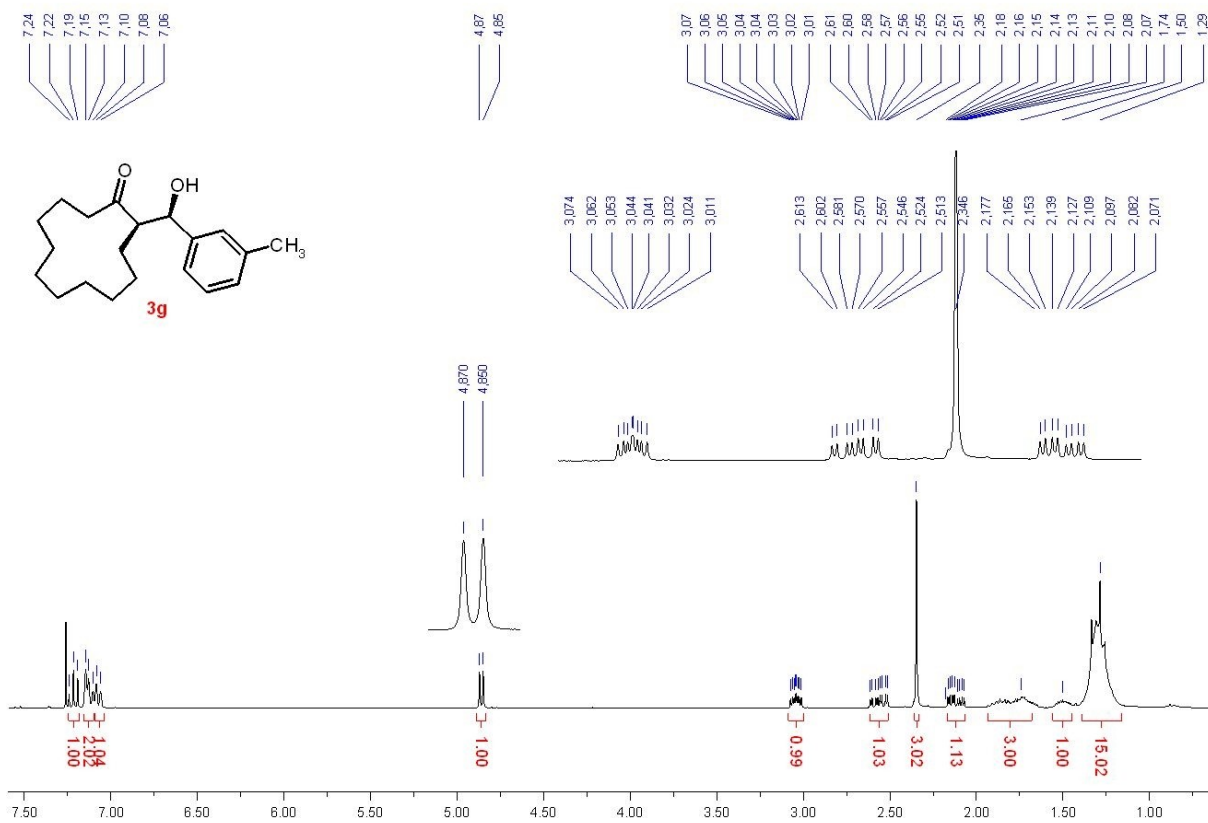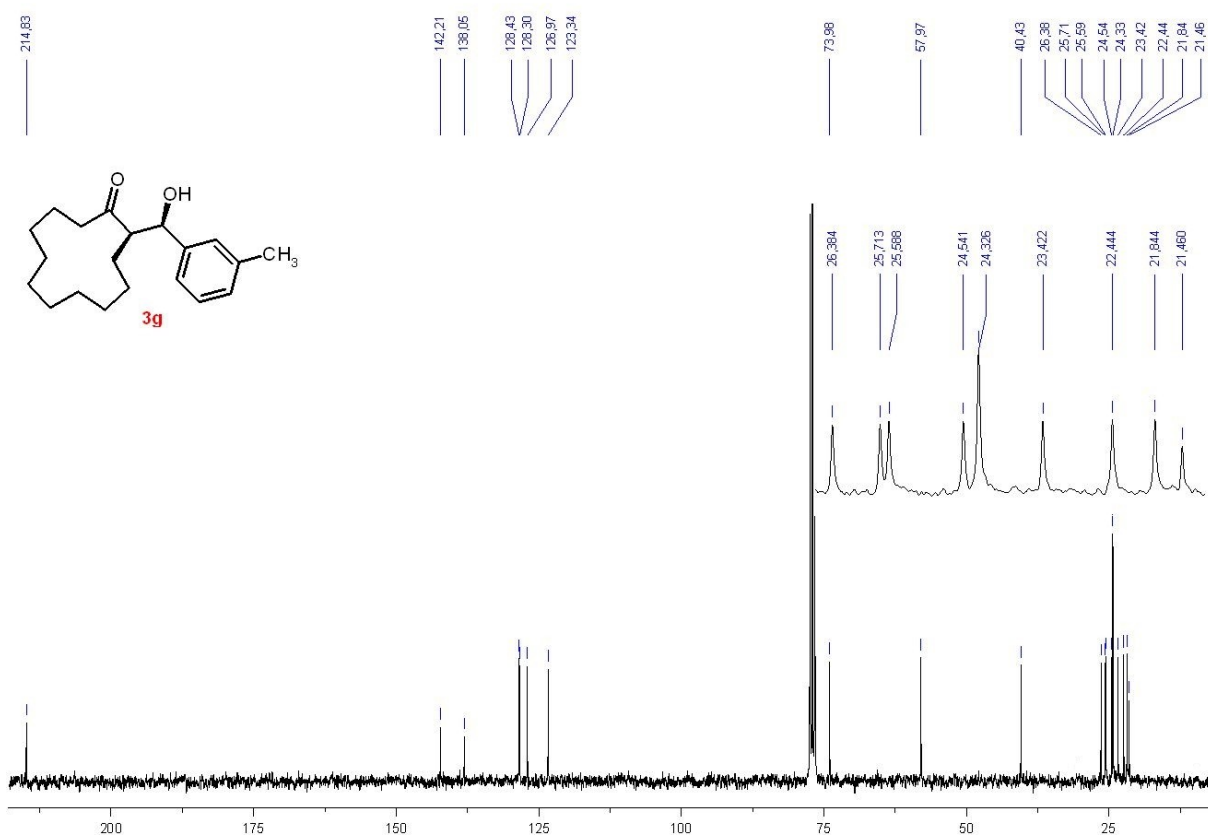

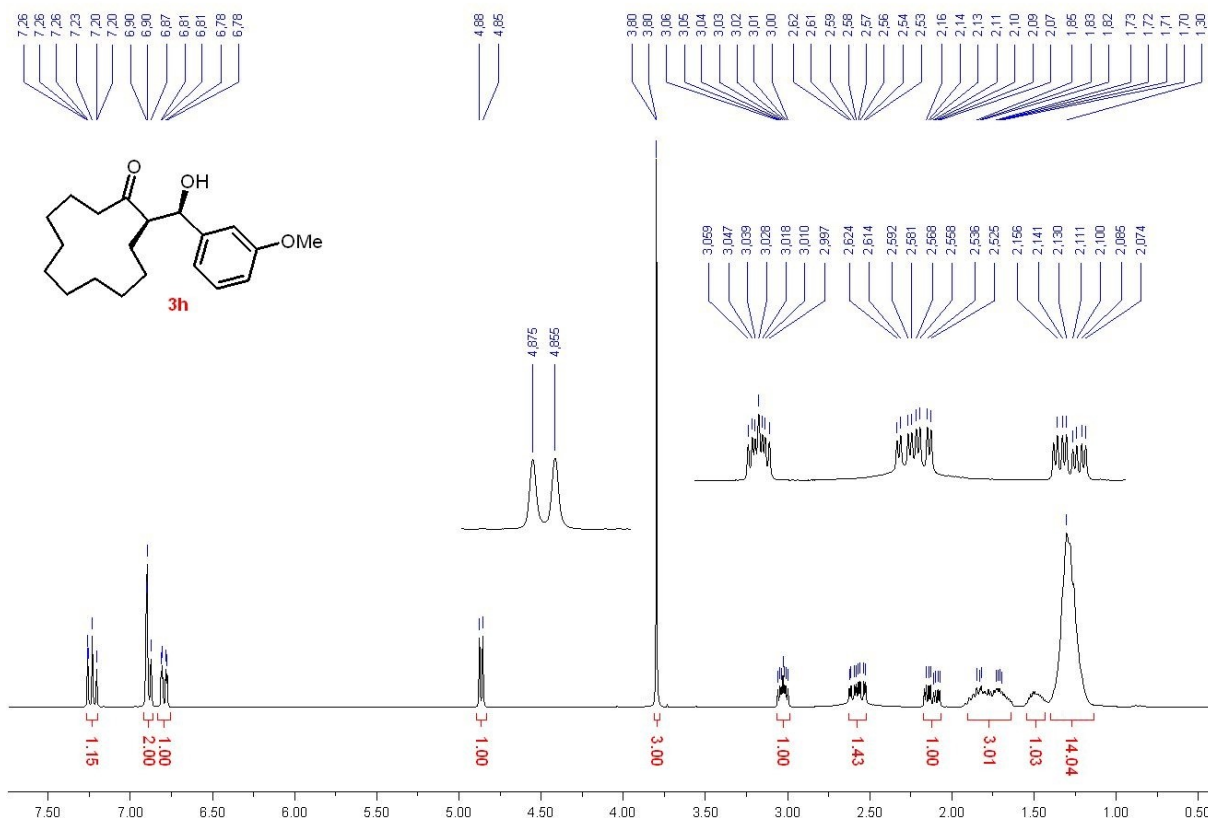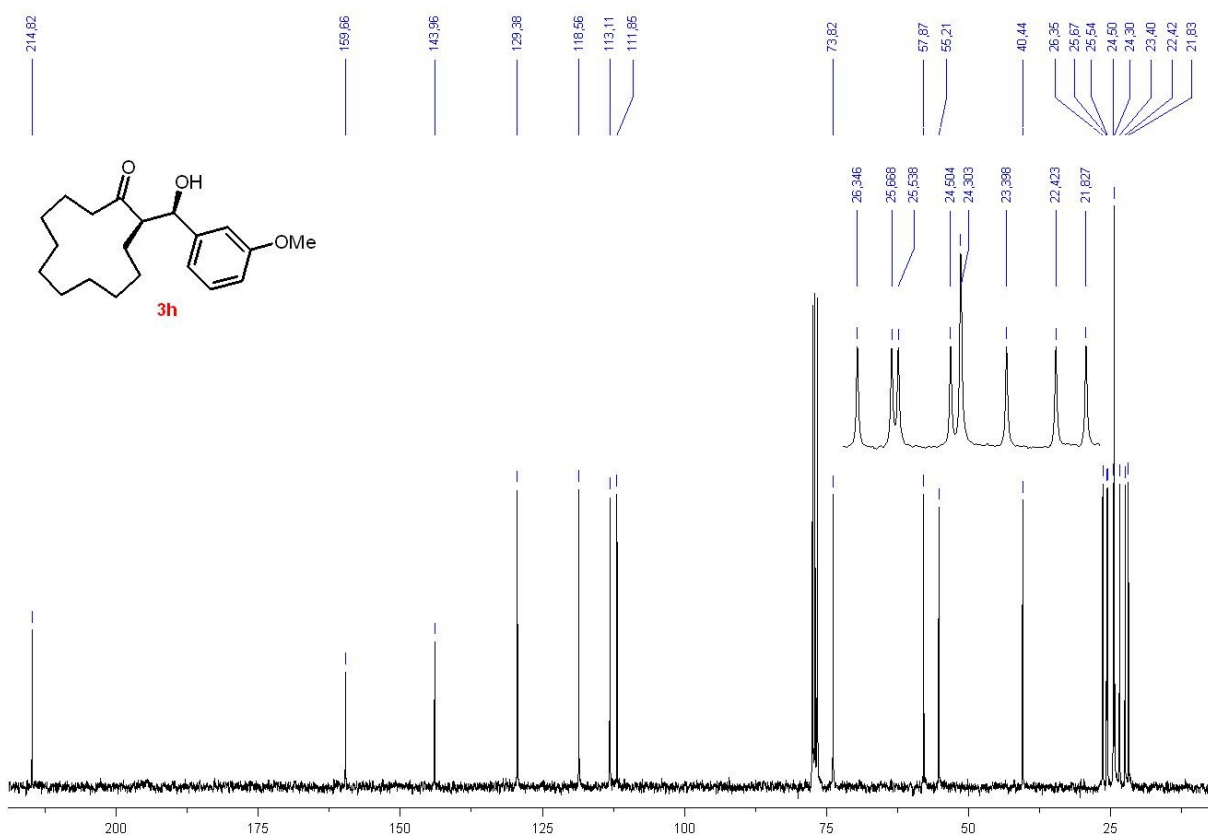

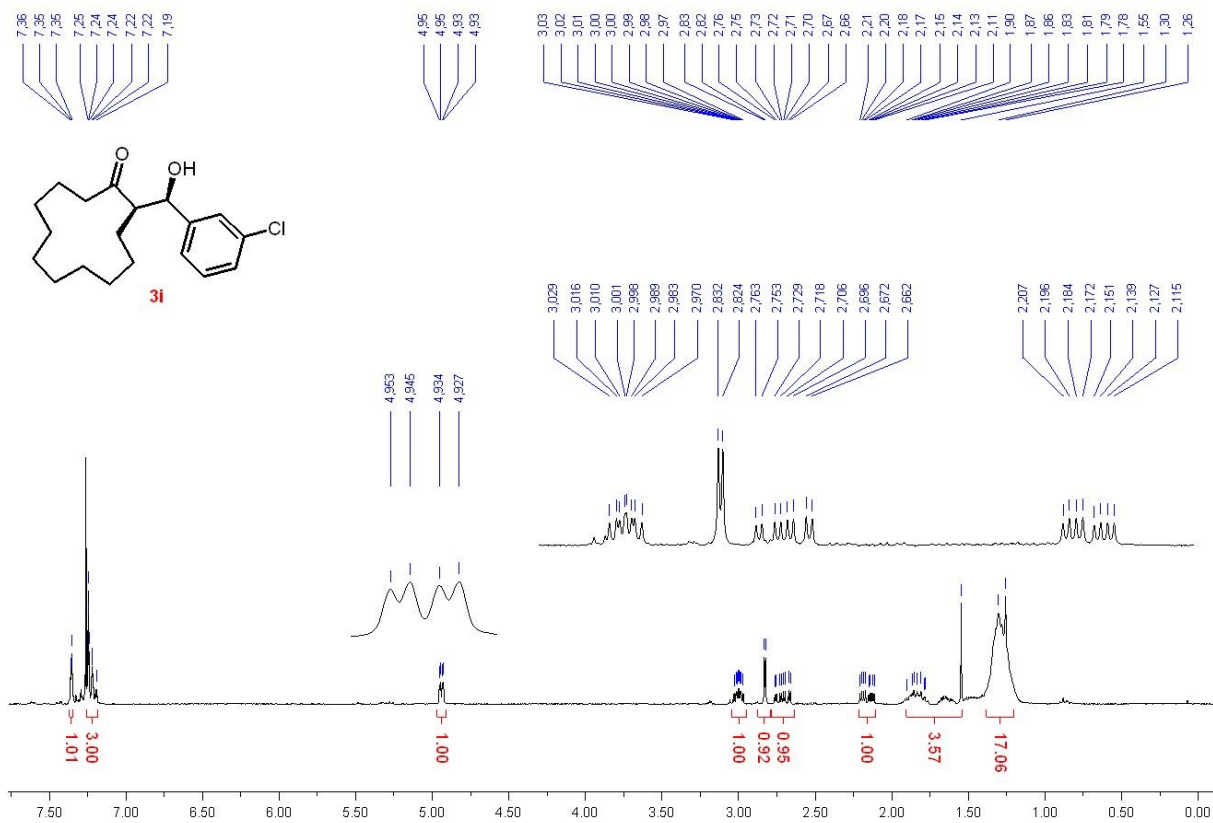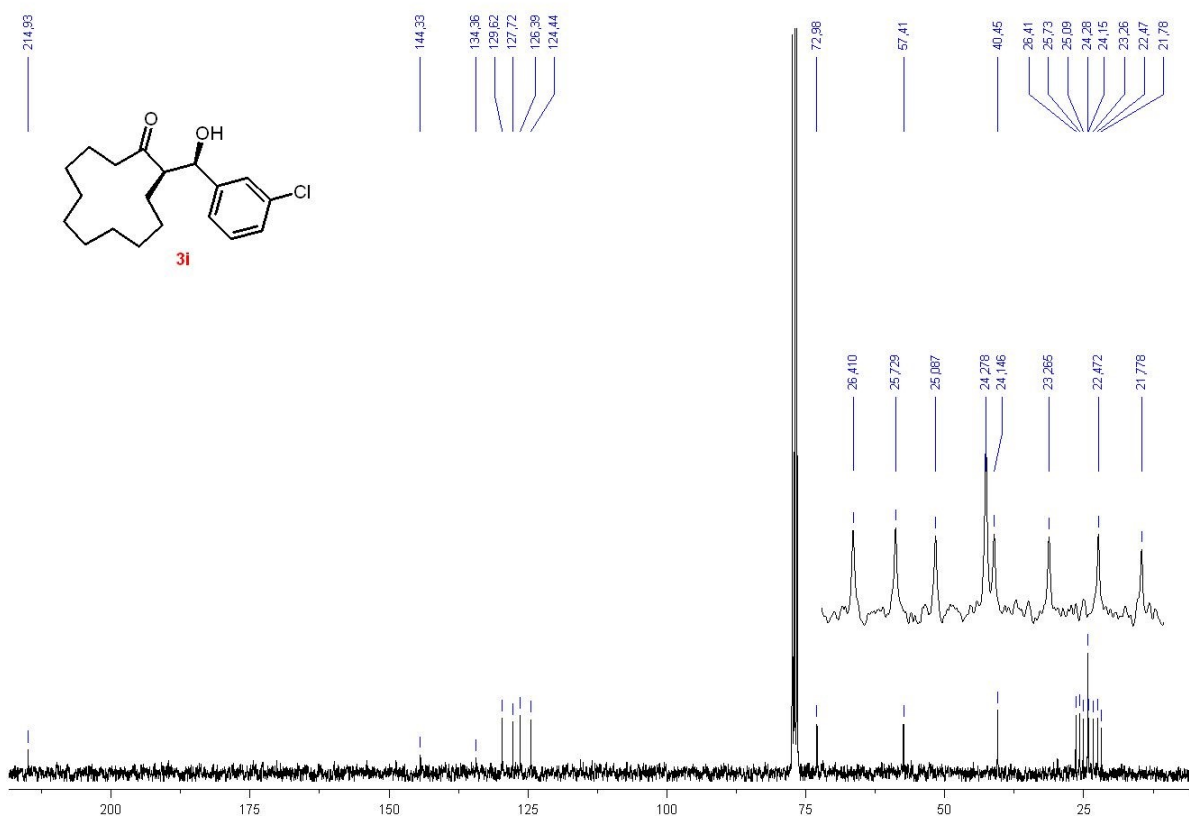

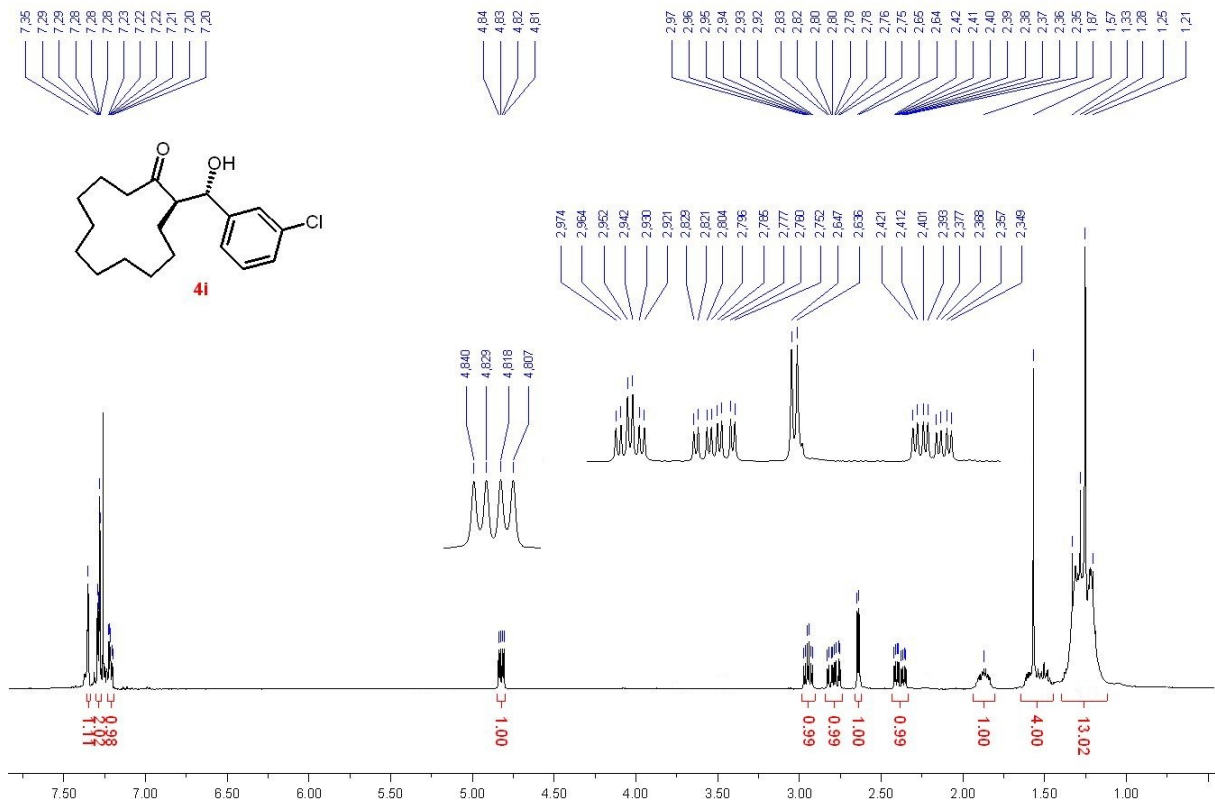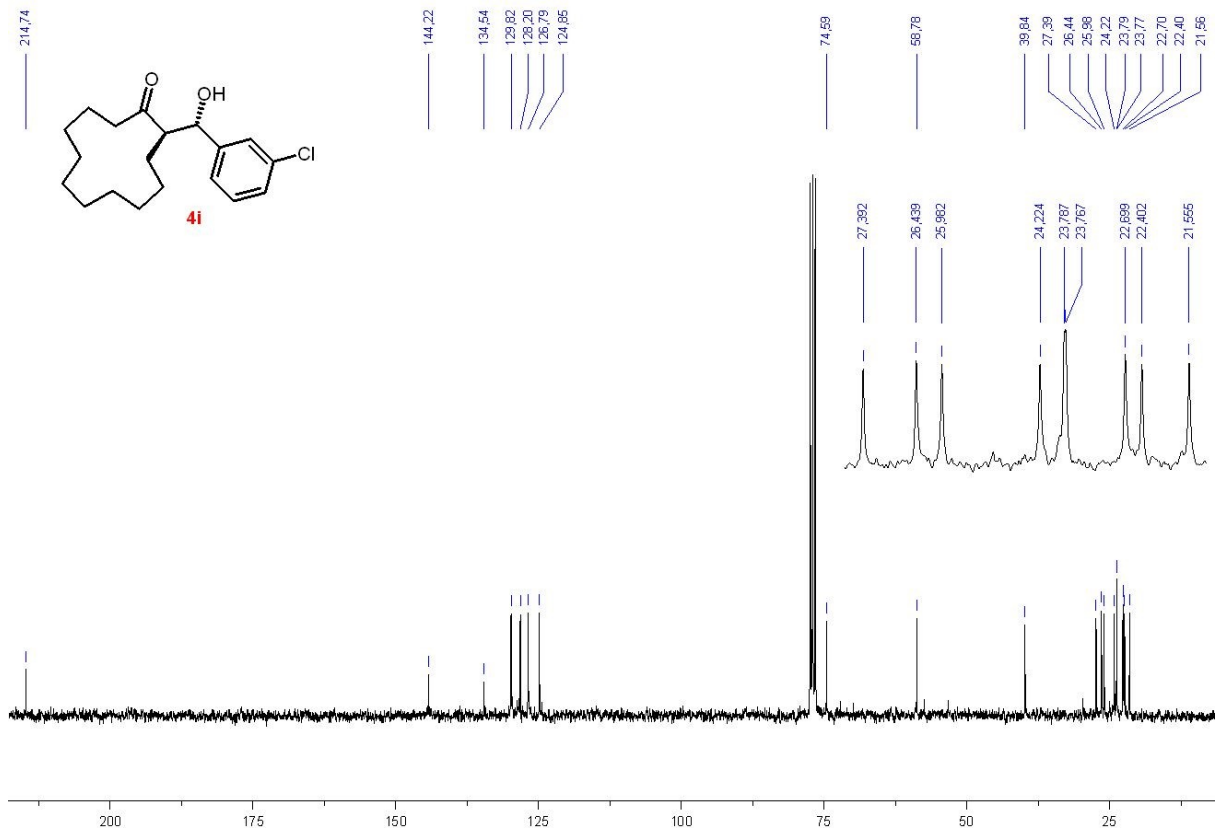



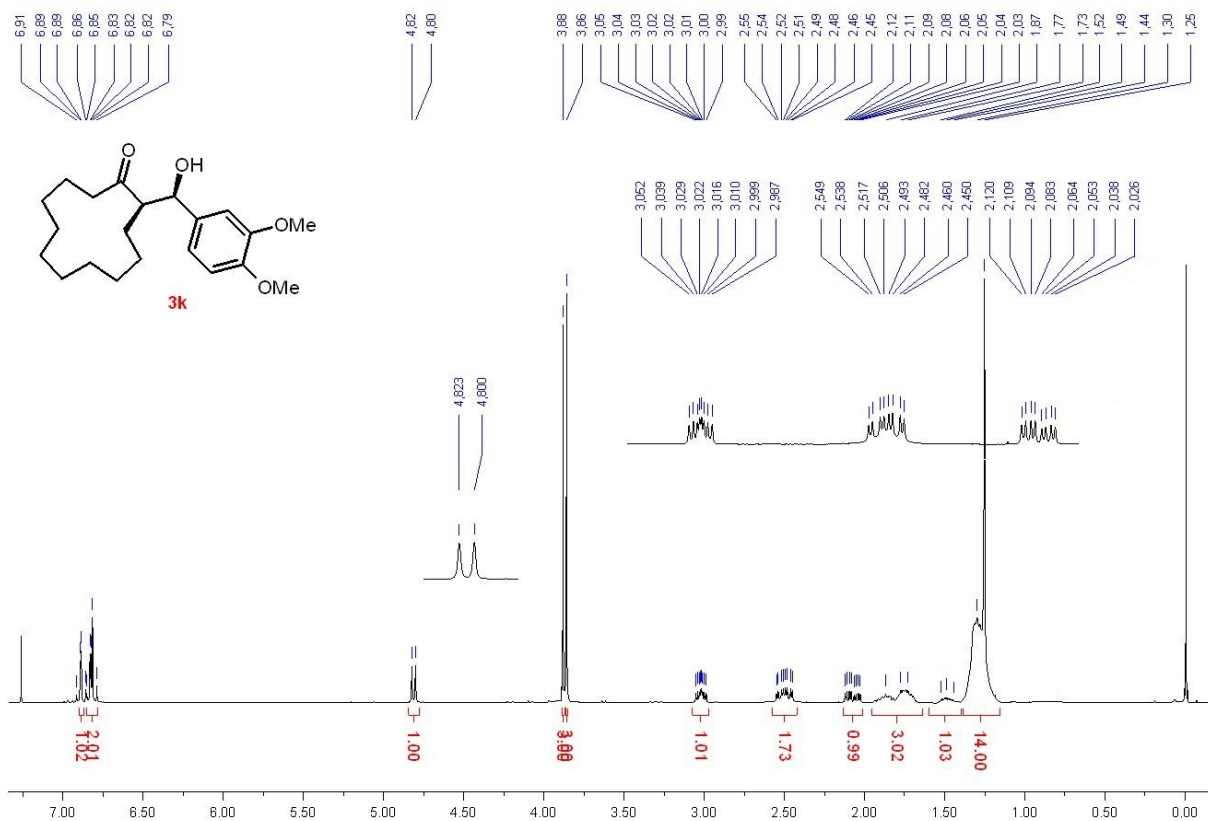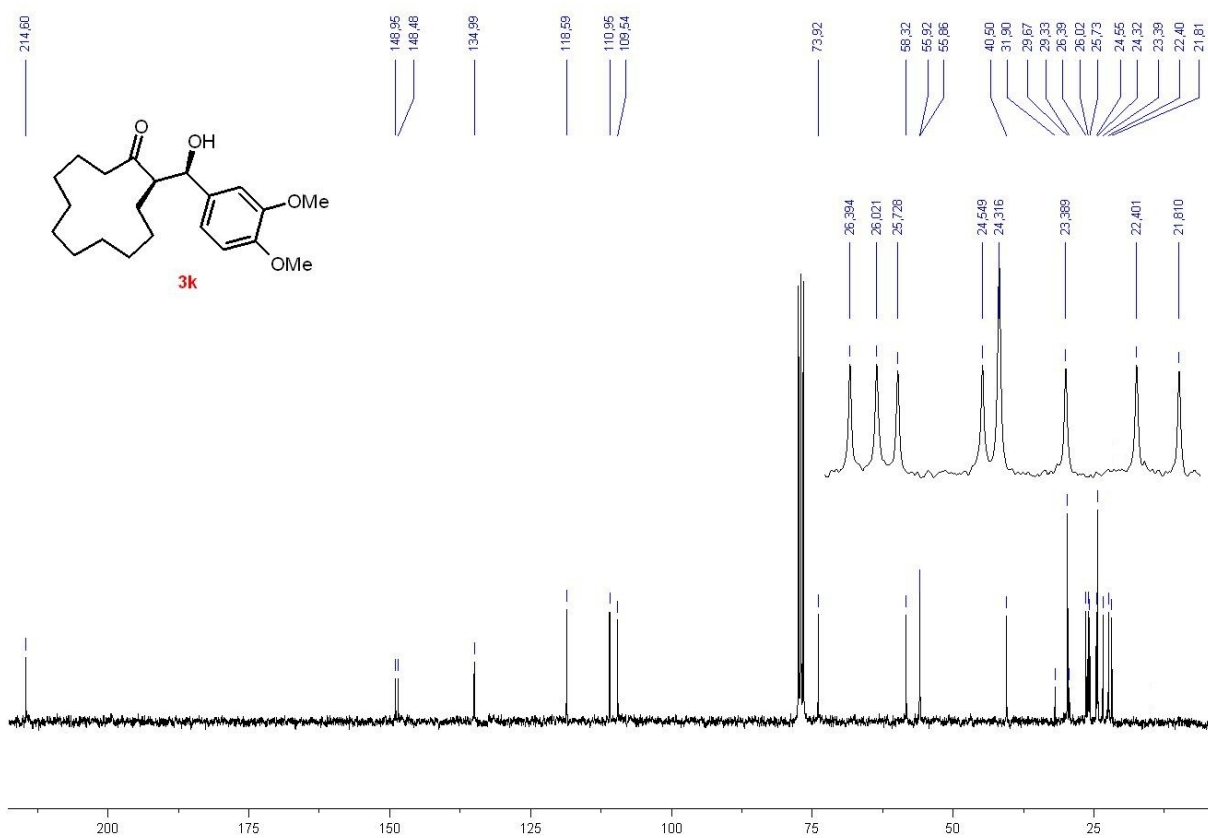









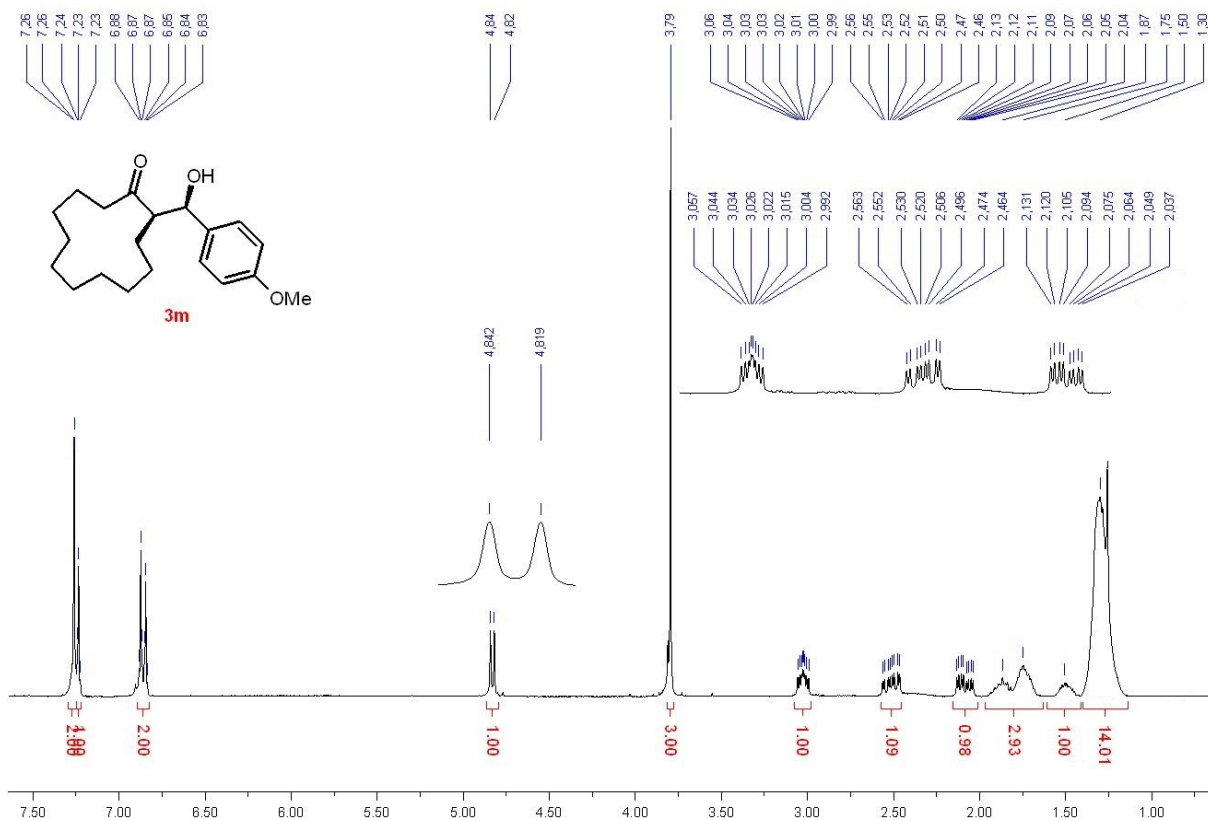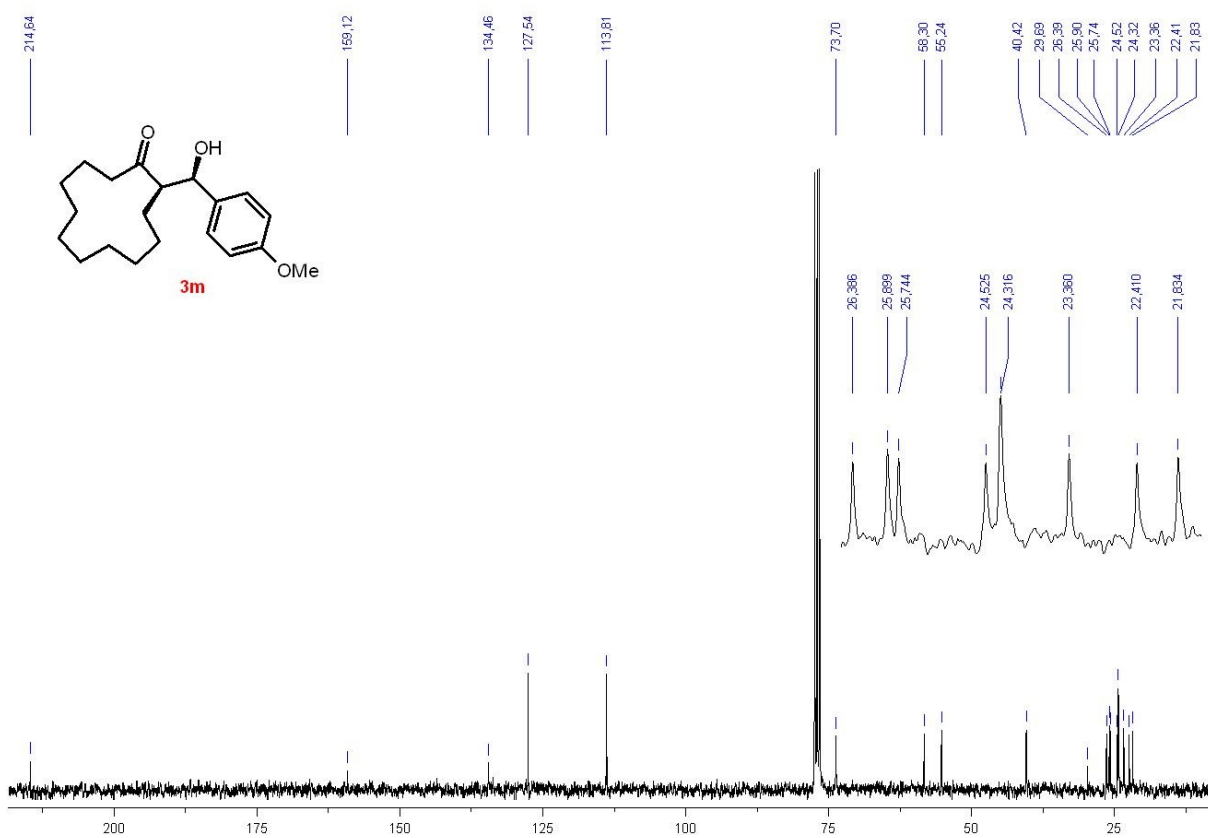

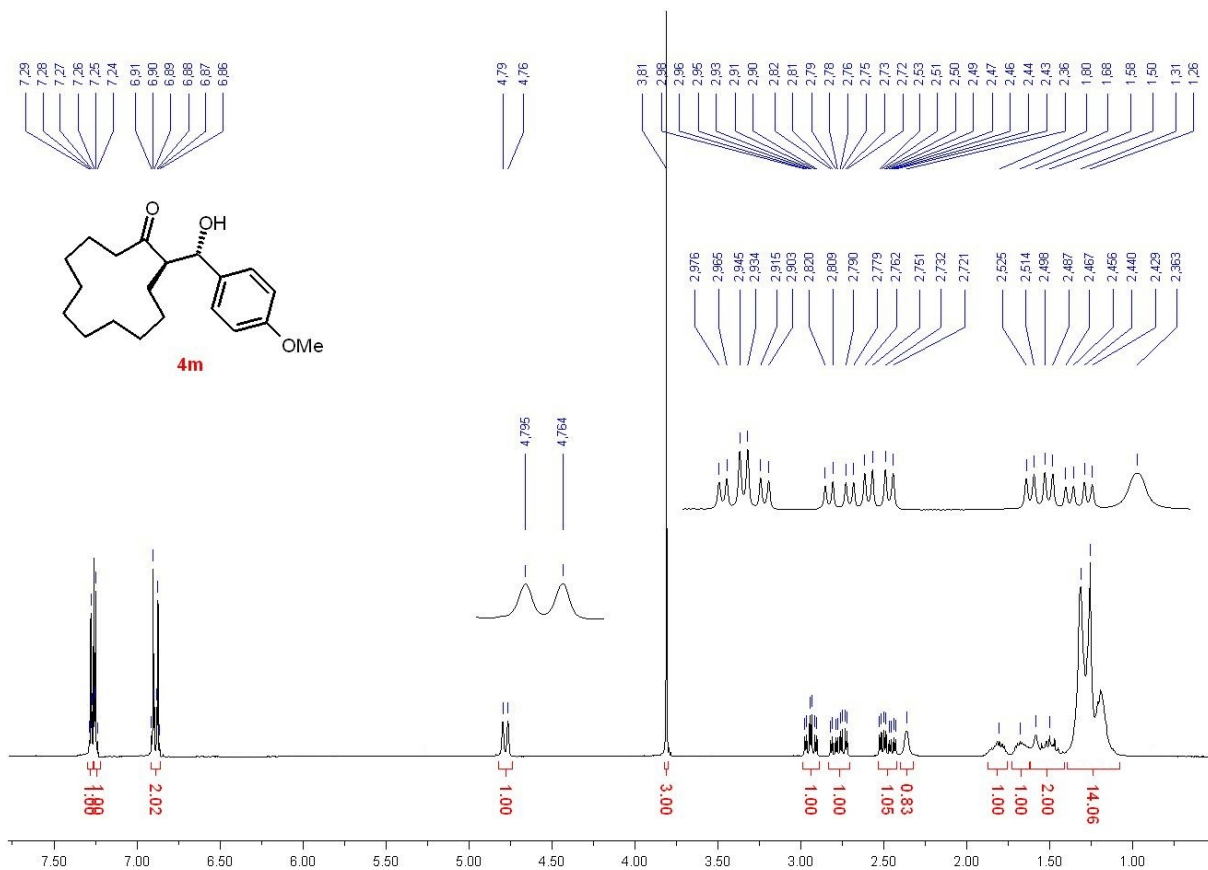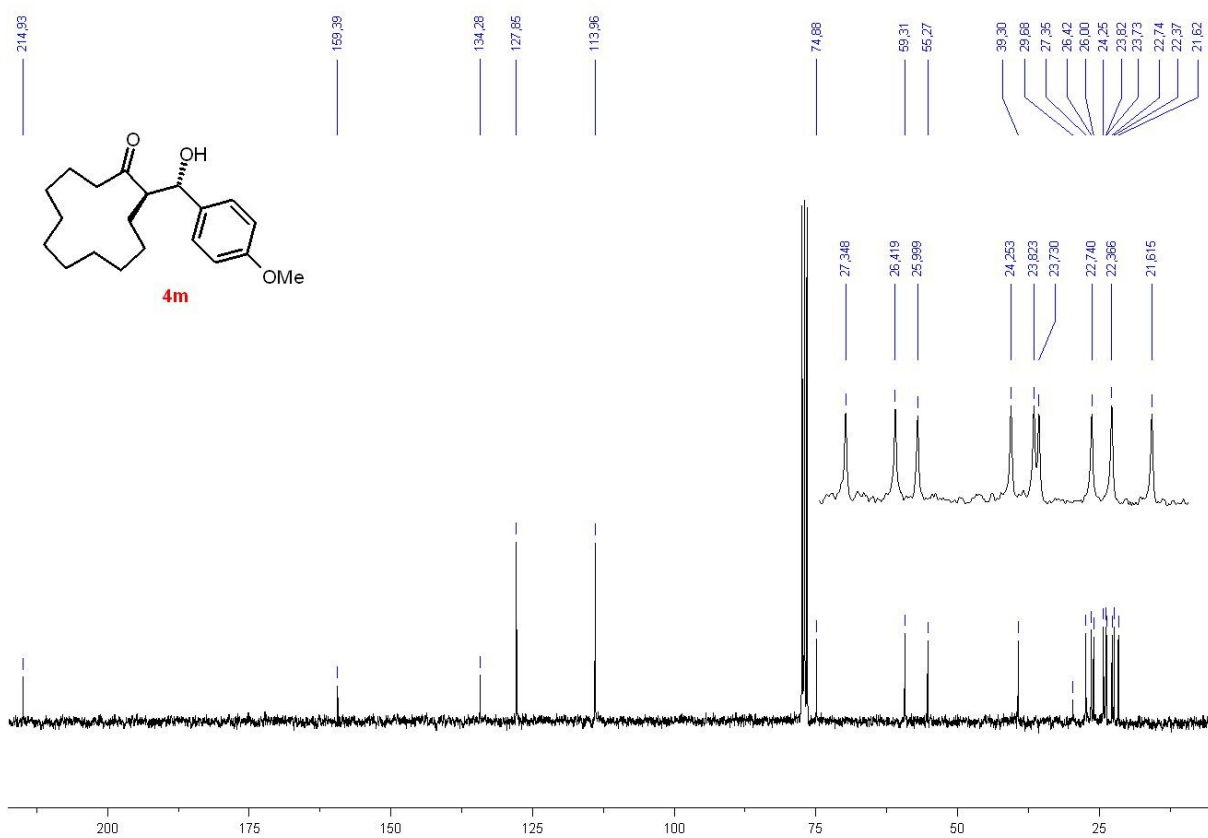

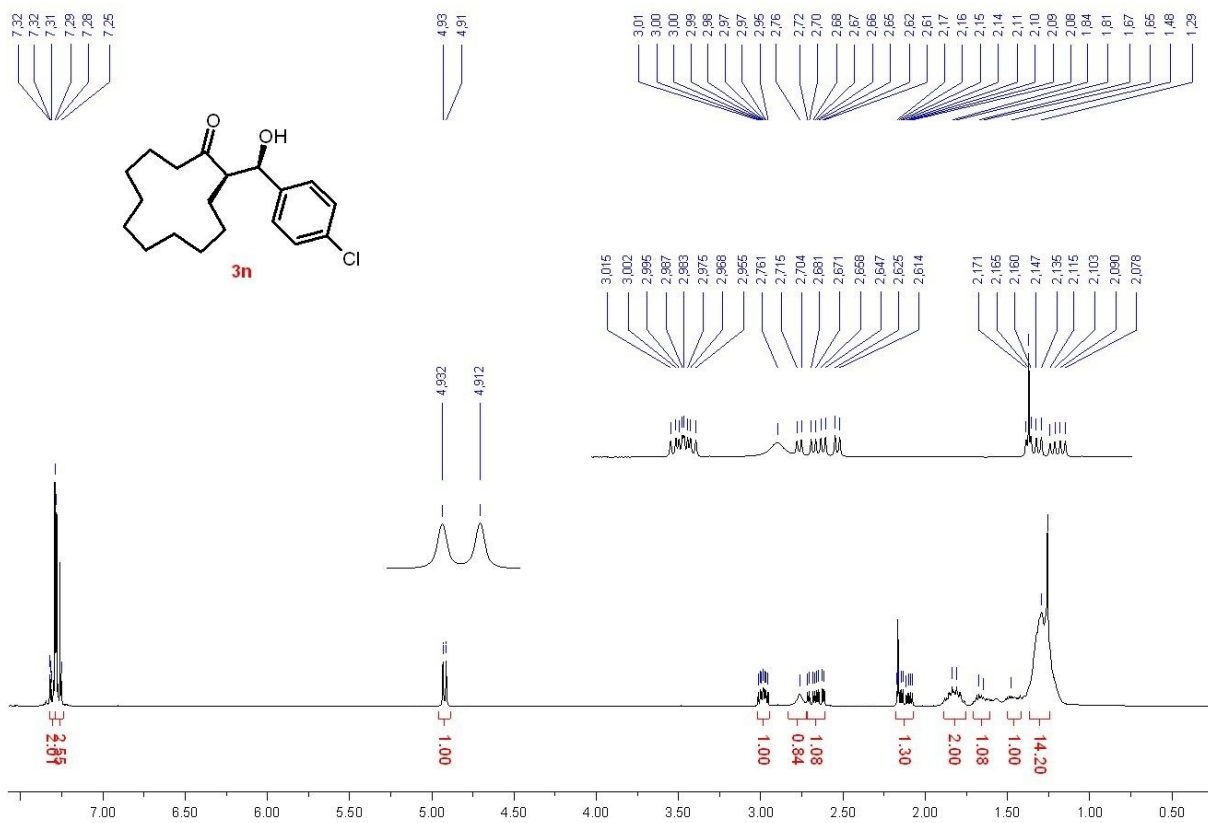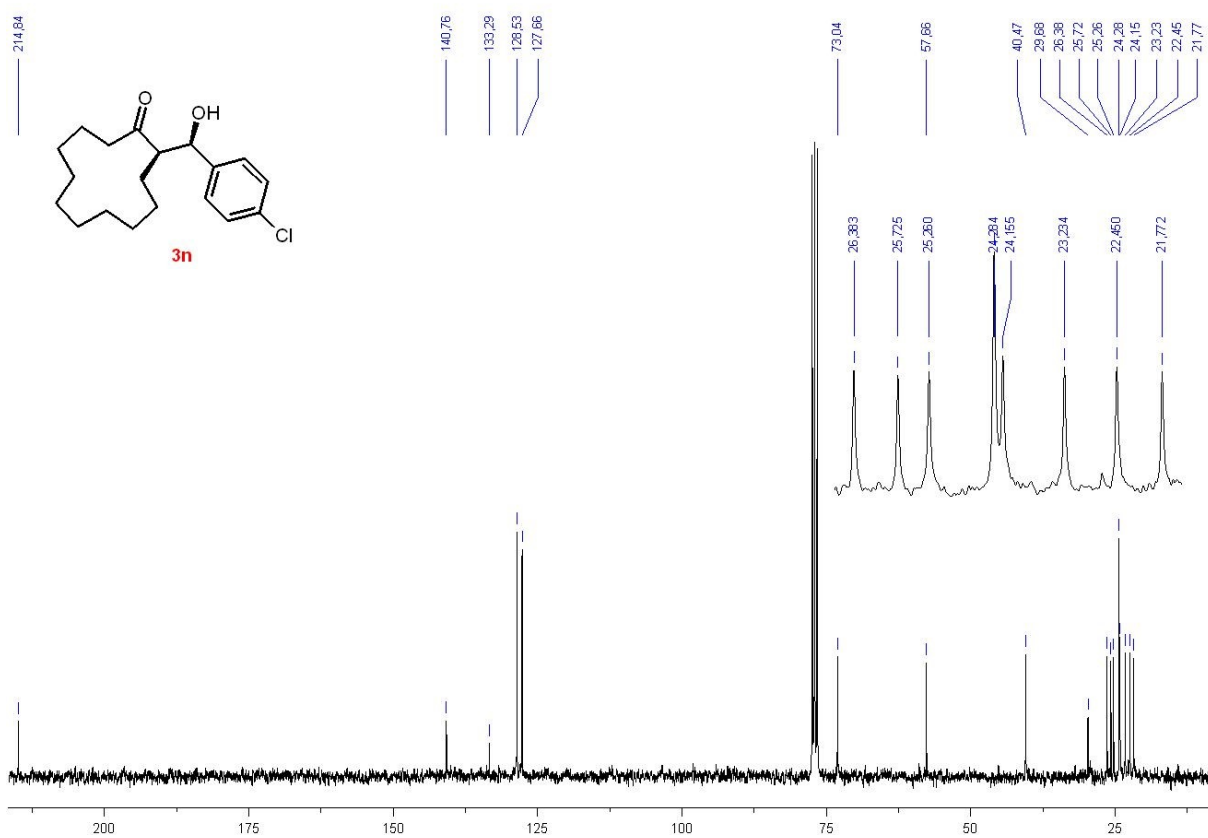

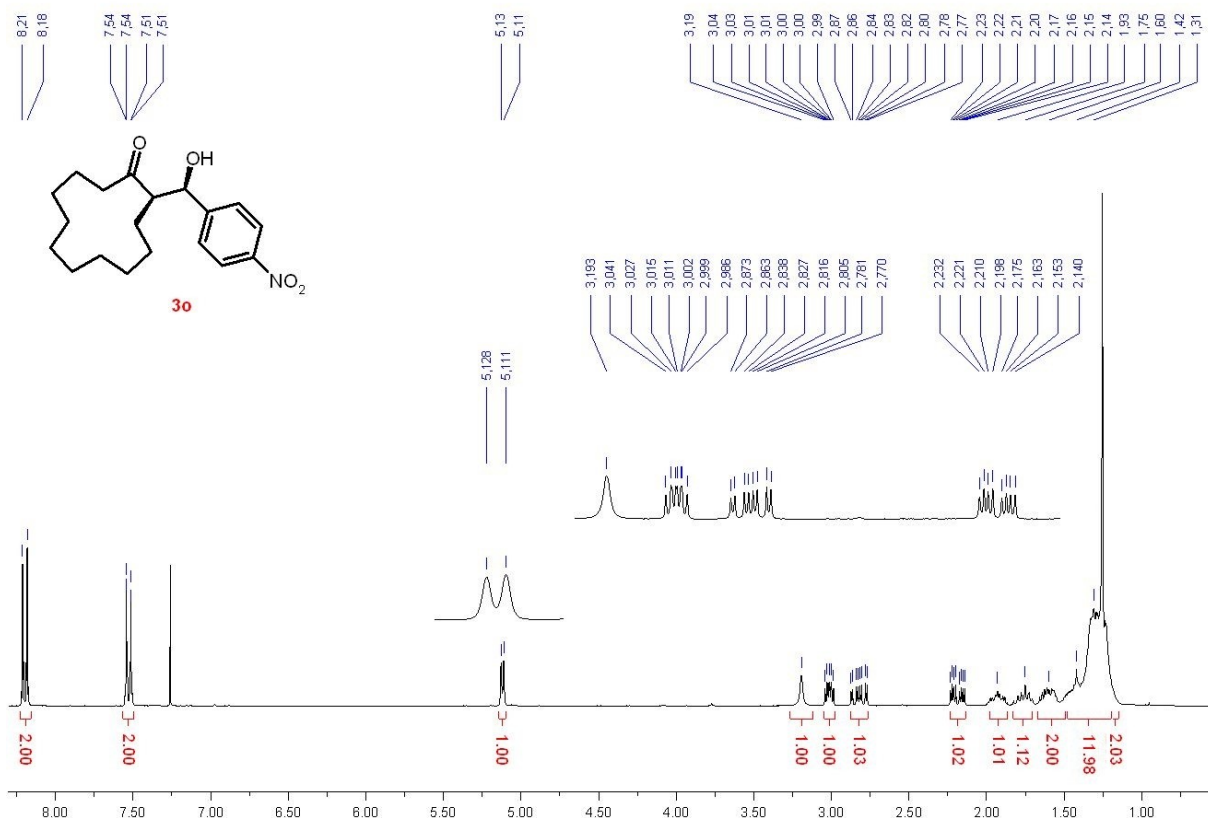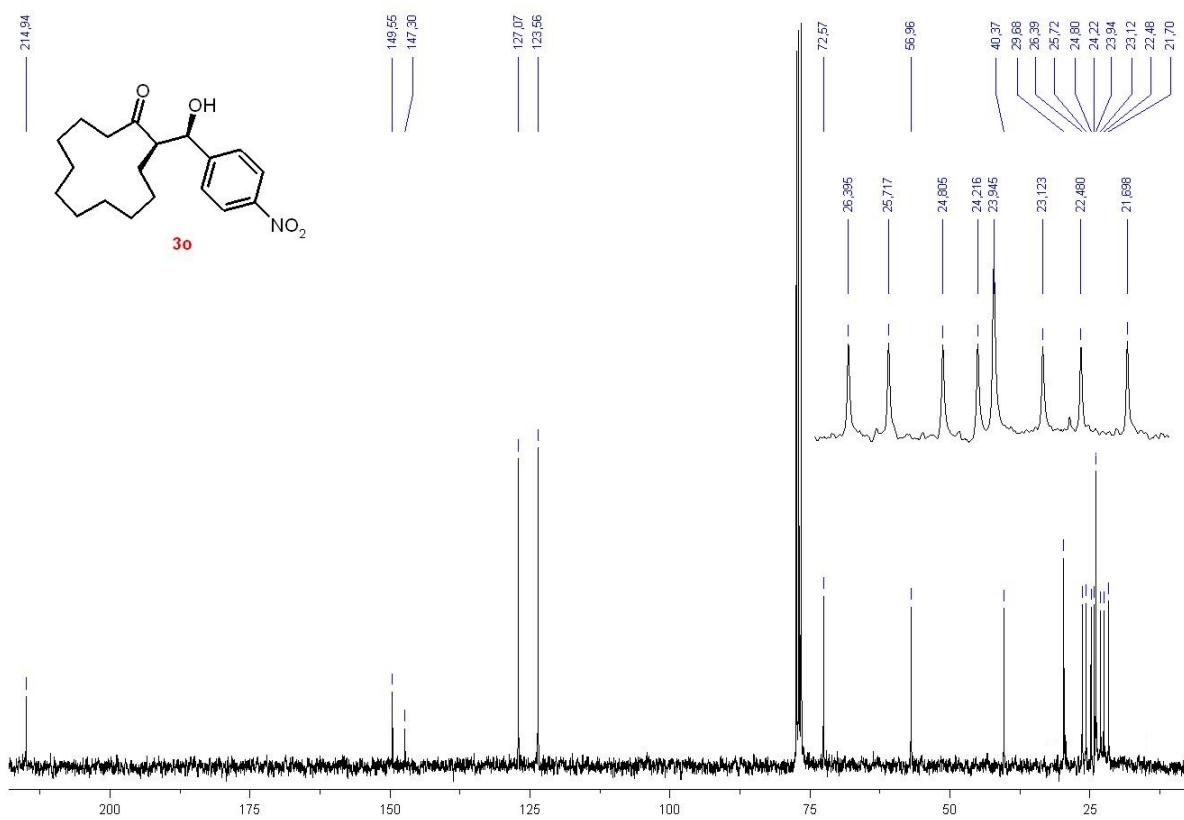

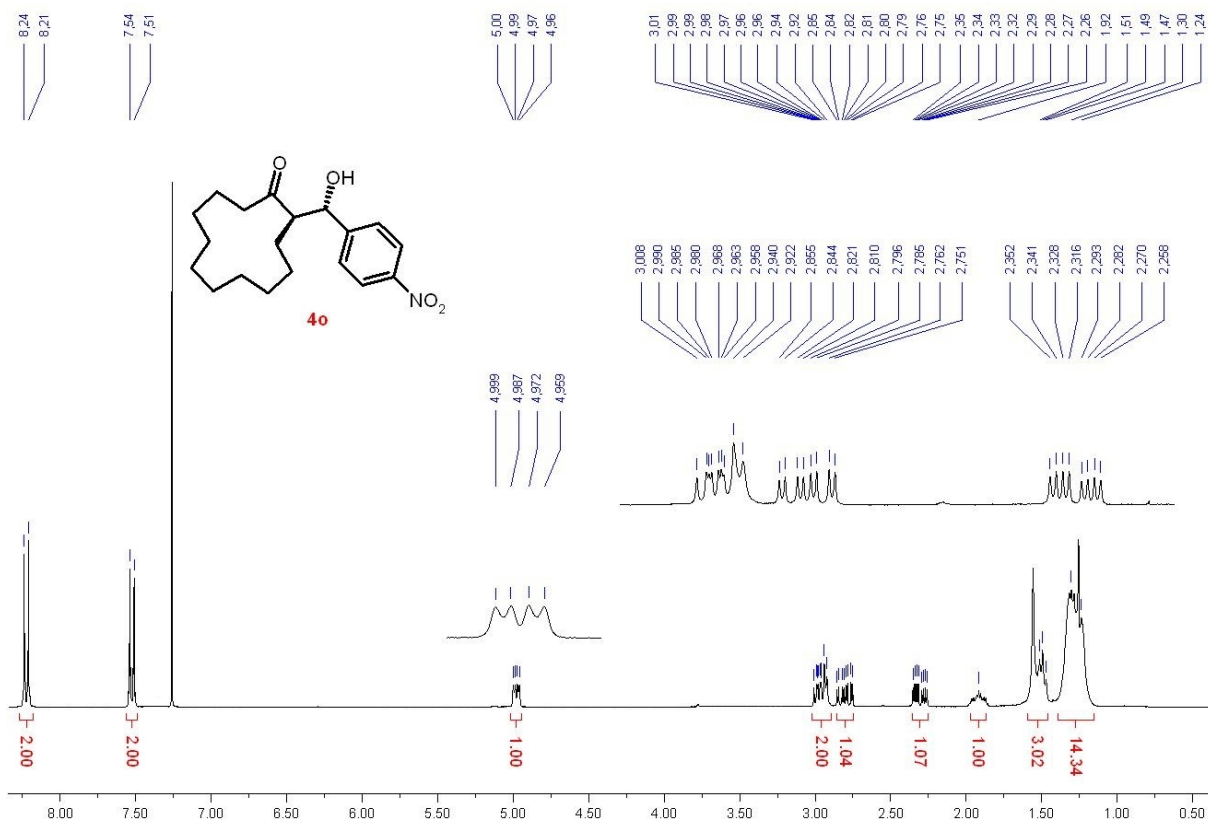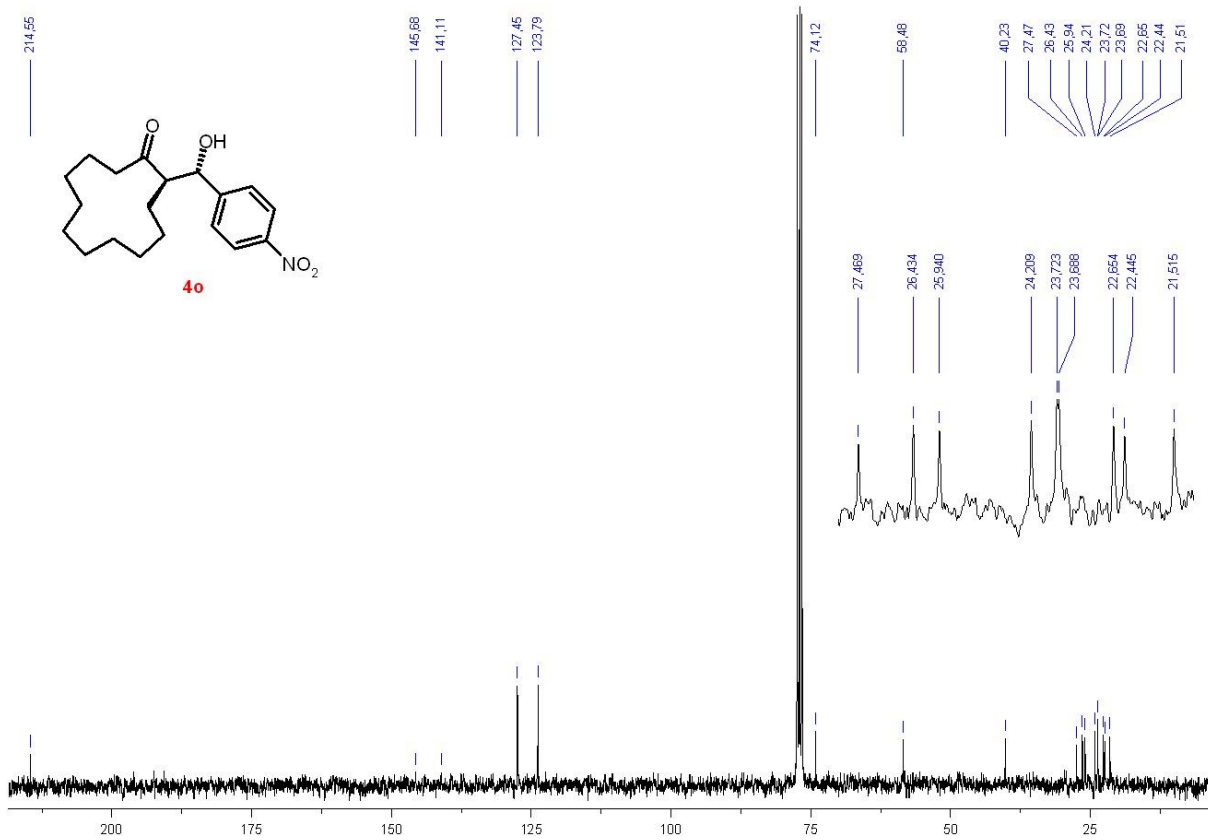

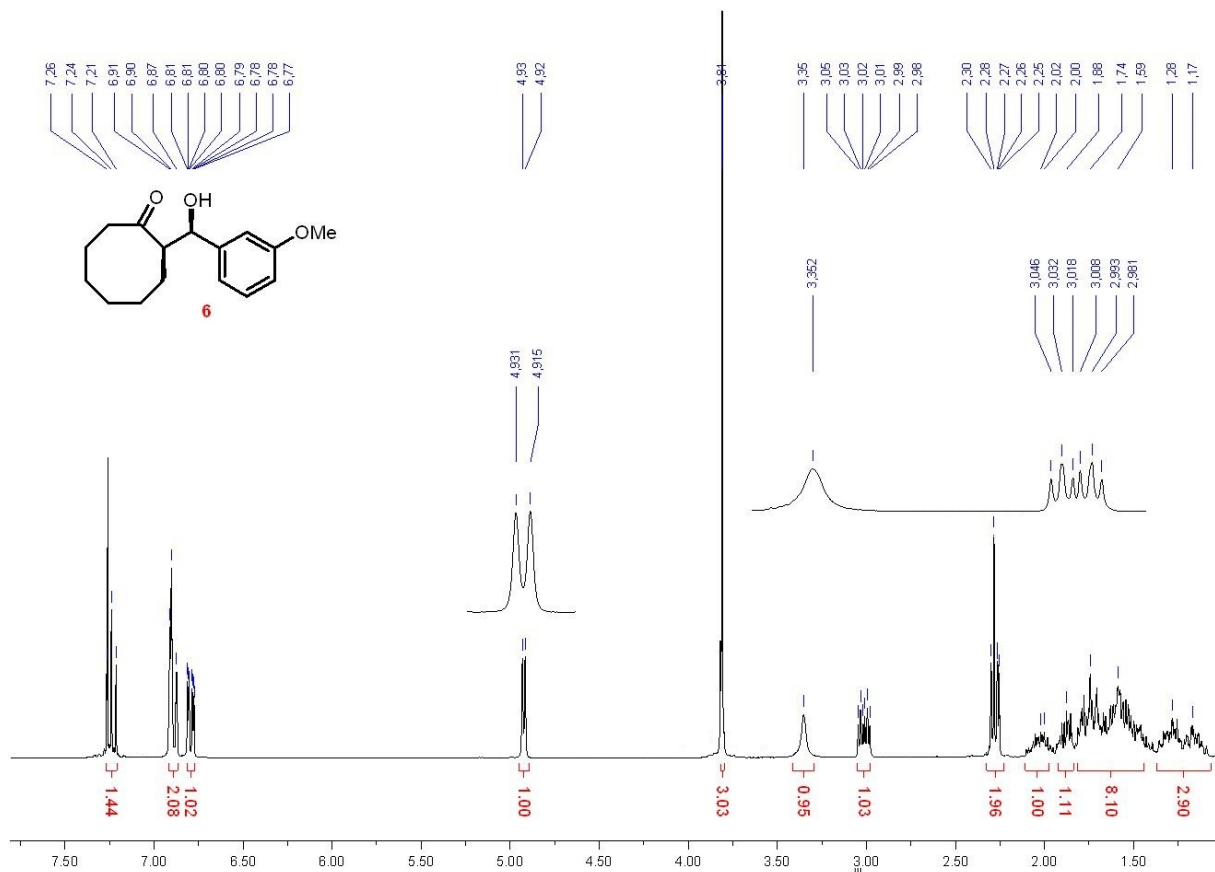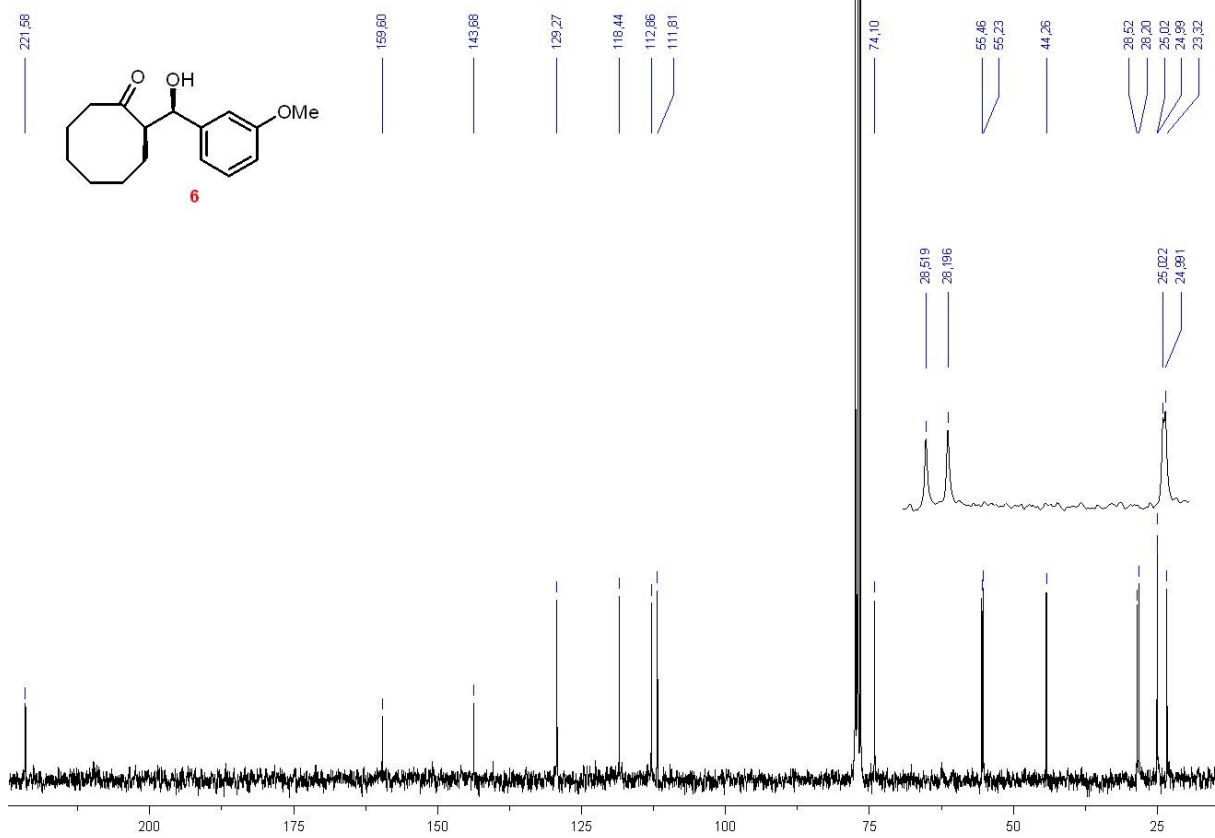



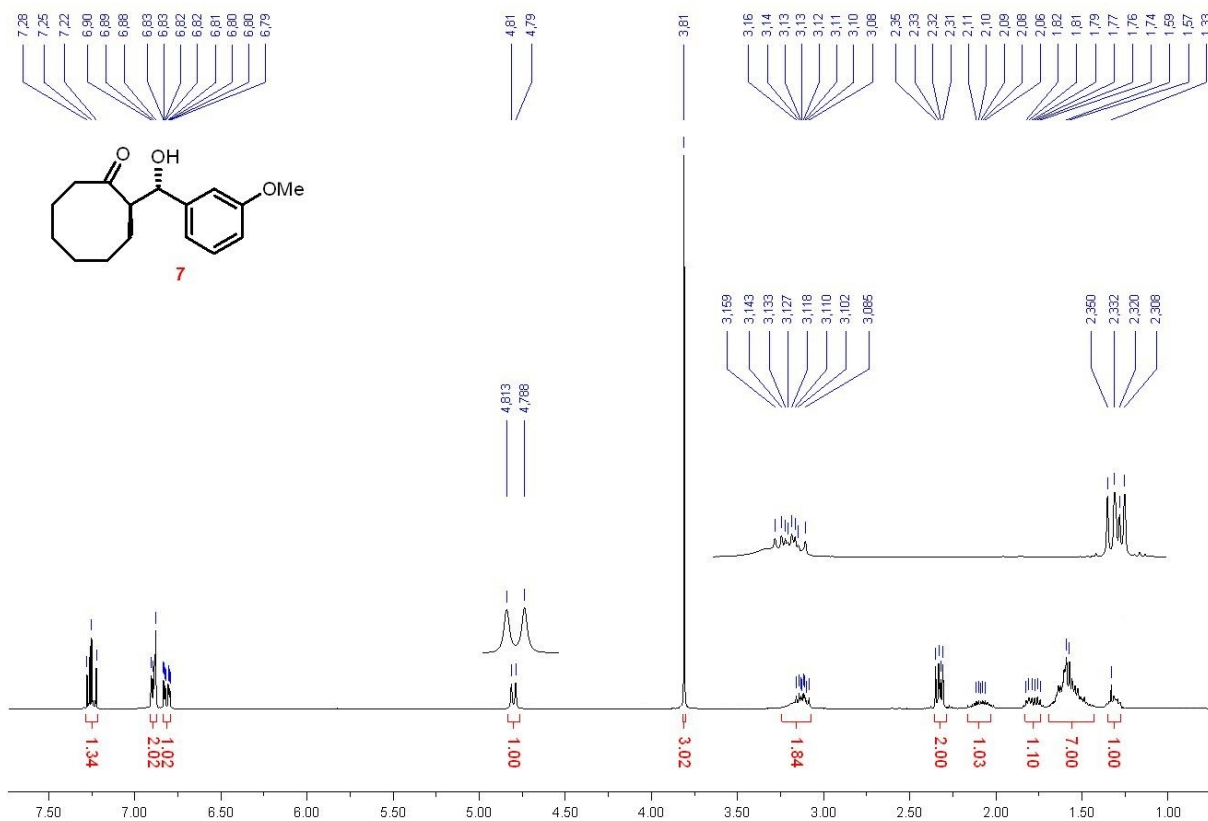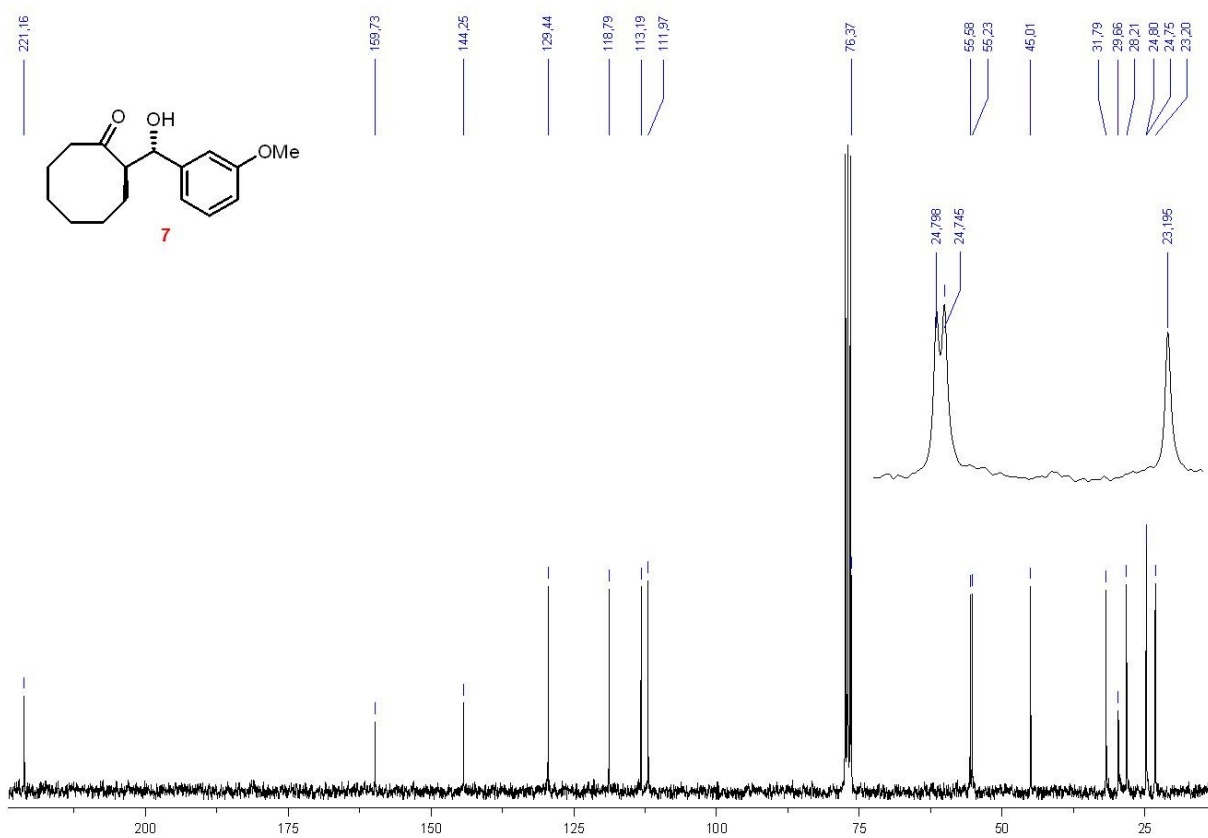



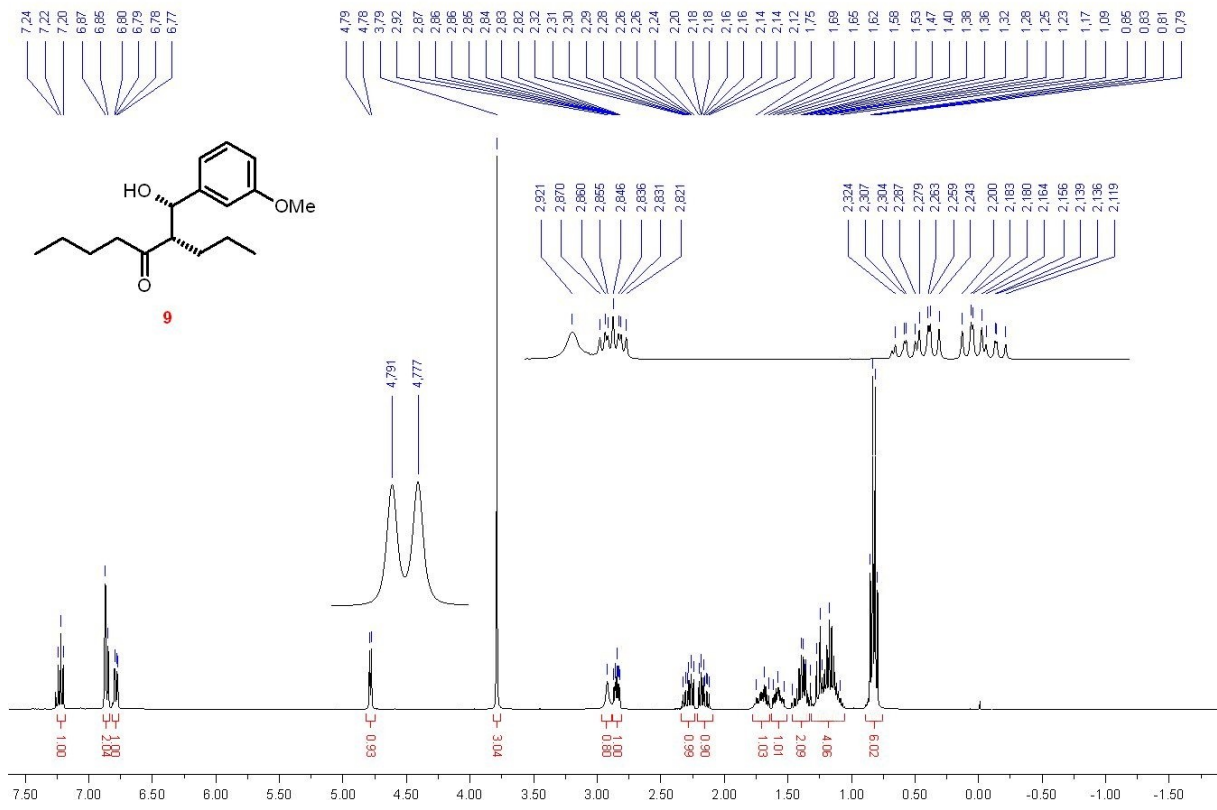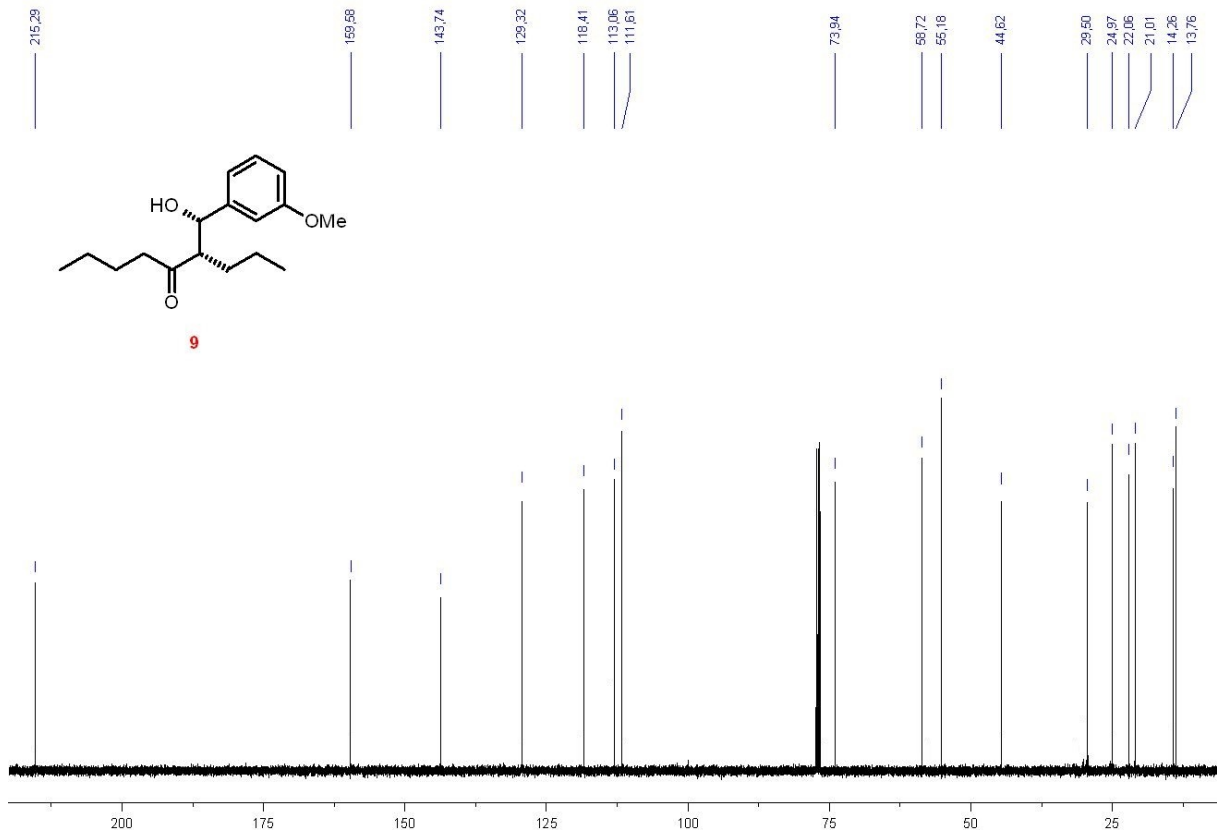

Supplement: d3nj02355a1.pdf [file d3nj02355a1.pdf]
